# Supplementary material for: A theoretical study on the unusual square-planar structure of bis(imino)pyridine-ligated Group 13 complexes
Source: Royal Society of Chemistry journal article supplement (doi:10.1039/c6dt03775e), 2016-11-22
Supplement: c6dt03775e1.pdf [file c6dt03775e1.pdf]

## Supporting Information

### Theoretical study on the unusual square-planar structure of bis(imino)pyridine-ligated Group 13 complexes

*Weiyi Li, \* Yajing Lyu, Huifang Zhang, Maoqin Zhu and Hanping Tang*

School of Science, Xihua University, Chengdu, Sichuan, 610039, P. R. China.

E-mail: weiyili@mail.xhu.edu.cn; Fax: +86-028-87727663; Tel: +86-028-87727663

#### CONTENTS:

|                                                                               |    |
|-------------------------------------------------------------------------------|----|
| S1: Computational details.....                                                | 2  |
| S2: Assessment on the computational protocol.....                             | 2  |
| S3: Nature bond orbital analysis.....                                         | 5  |
| S4: Summary of energy and spin-contamination of the optimized structures..... | 7  |
| S5: Cartesian coordinates of the optimized structures.....                    | 8  |
| S6: Reference 12 details. ....                                                | 40 |

## S1: Computational details

Optimization and frequency calculation in gas phase: M06-2X/6-31G\*, the key words (Opt = tight and Int = ultrafine) are used to get more accurate results.

Single-point energy calculation in benzene solvent: M06-2X/6-311++G(d, p), LANL2DZ using SMD solvent model.

## S2: Assessment on the computational protocol

To assess the present computational method, the optimization and frequency calculations for the  $C_2$ -symmetric Bis(imino)pyridine complex of  $Al^{III}$ , denoted as  ${}^1(PhI_2P)AlH-SP$  (complex **1**), were carried out with different functionals (*e.g.* B3LYP, BP86 and M06-2X) and basis sets (6-31G\* and cc-PVDZ), respectively. The calculations show that the closed-shell single state ( $S=0$ ) structure is the ground state of complex **1**, which lies approximately 7.0~10.0 kcal mol<sup>-1</sup> (depending on the computational method) below the analogue biradical triplet state ( $S=1$ ) structure. This computed result is in good agreement with the experimental observation that the complex **1** was found to be diamagnetic.<sup>6a,b</sup> As a result, the key geometrical parameters and IR frequency of the Al–H stretching vibration for the ground state of the complex **1** are listed in Table S1 to make a further comparison of the computational and experimentally determined results.

As shown in Fig. S1 and Table S1, the geometric optimization of complex **1** with the three different DFT functionals and two basis sets could generally well reproduce the SP geometry for the  $Al^{III}$  center in four-coordinate complex **1**, as indicated by the comparable  $\tau_4$  values (0.14 vs 0.13). However, the structural parameters and of IR frequencies of the Al–H stretching vibration obtained from the B3LYP and BP86 functional with correlation-consistent cc-PVDZ basis set deviated somewhat from those of the solid-state complex. Especially for the Al– $N_{im}$  and Al– $N_{py}$  bond lengths, the largest discrepancies between the computational and experimental data exceed the accepted error of the calculations (0.05 Å). On the contrary, the geometries and IR frequency of the Al–H stretching vibration of complex calculated at the M06-2X/6-31G\* level of theory are closed to the corresponding experimental data, in which the differences in bond lengths and bond angles are less than 0.03 Å and 2.0 degree. In addition, geometric optimization of complex **1** was also performed with the SMD solvation model in THF solvent. However, the calculation accuracy is not significantly

improved (Table S2), suggesting that solvent effect may have small impact on the geometric structure of the present complex. Considering the above results and the computational cost, we believe that the geometric optimization in gas phase at the M06-2X/6-31G\* level of theory is reliable for the present system.

**Table S1** Structural parameters and the Al-H stretching vibration frequency of complex **1** calculated in the gas phase.

|                                        | B3LYP   | BP86  | M06-2X | B3LYP  | BP86  | M06-2X | exp.<br>Data <sup>6a,b</sup> |
|----------------------------------------|---------|-------|--------|--------|-------|--------|------------------------------|
|                                        | cc-PVDZ |       |        | 6-31G* |       |        |                              |
| Al-N <sub>im</sub>                     | 2.015   | 2.017 | 1.989  | 1.996  | 1.999 | 1.972  | 1.942                        |
| Al-N <sub>py</sub>                     | 1.860   | 1.881 | 1.855  | 1.849  | 1.869 | 1.845  | 1.833                        |
| Al-H                                   | 1.583   | 1.599 | 1.583  | 1.583  | 1.597 | 1.584  | 1.570                        |
| N <sub>im</sub> -C <sub>im</sub>       | 1.359   | 1.370 | 1.348  | 1.359  | 1.370 | 1.347  | 1.363                        |
| N <sub>py</sub> -C <sub>py(p)</sub>    | 1.392   | 1.396 | 1.385  | 1.389  | 1.394 | 1.384  | 1.386                        |
| C <sub>im</sub> -C <sub>py(o)</sub>    | 1.430   | 1.441 | 1.426  | 1.427  | 1.439 | 1.423  | 1.427                        |
| C <sub>py(o)</sub> -C <sub>py(m)</sub> | 1.396   | 1.404 | 1.392  | 1.394  | 1.403 | 1.390  | 1.395                        |
| C <sub>py(m)</sub> -C <sub>py(p)</sub> | 1.403   | 1.410 | 1.401  | 1.400  | 1.408 | 1.399  | 1.403                        |
| N <sub>im</sub> -Al-N <sub>py</sub>    | 80.1    | 80.0  | 79.9   | 80.4   | 80.2  | 80.2   | 81.0                         |
| N <sub>im</sub> -Al-N <sub>im</sub> '  | 160.2   | 159.9 | 159.8  | 160.8  | 160.6 | 160.4  | 161.9                        |
| N <sub>im</sub> -Al-H                  | 99.9    | 100.0 | 100.1  | 99.6   | 99.0  | 99.8   | 99.0                         |
| N <sub>py</sub> -Al-H                  | 180.0   | 180.0 | 180.0  | 180.0  | 180.0 | 180.0  | 180.0                        |
| $\tau_4$                               | 0.14    | 0.14  | 0.14   | 0.14   | 0.14  | 0.14   | 0.13                         |
| Al-H stretching<br>vibration           | 1898    | 1841  | 1920   | 1935   | 1842  | 1939   | 1966                         |

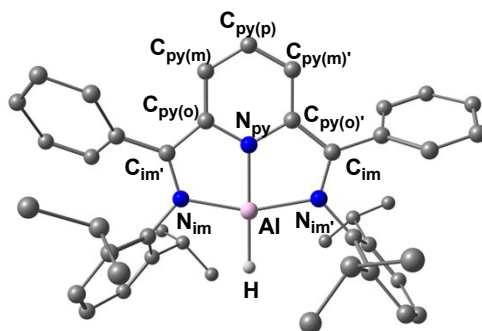

**Complex 1**

**Fig. S1** Optimized-structure of the complex **1**. All H atoms except hydride atom are omitted for clarity.

**Table S2** Structural parameters and the Al–H stretching vibration frequency of complex 1 calculated in THF solvent with SMD model.

|                                        | B3LYP   | BP86   | M06–2X | B3LYP  | BP86   | M06–2X | exp.<br>Data <sup>6a,b</sup> |
|----------------------------------------|---------|--------|--------|--------|--------|--------|------------------------------|
|                                        | cc–PVDZ |        |        | 6–31G* |        |        |                              |
| Al–N <sub>im</sub>                     | 2.017   | 2.019  | 1.990  | 2.000  | 1.999  | 1.970  | 1.942                        |
| Al–N <sub>py</sub>                     | 1.858   | 1.879  | 1.854  | 1.847  | 1.868  | 1.843  | 1.833                        |
| Al–H                                   | 1.584   | 1.599  | 1.584  | 1.584  | 1.598  | 1.586  | 1.570                        |
| N <sub>im</sub> –C <sub>im</sub>       | 1.360   | 1.371  | 1.348  | 1.360  | 1.371  | 1.348  | 1.363                        |
| N <sub>py</sub> –C <sub>py(p)</sub>    | 1.392   | 1.396  | 1.386  | 1.390  | 1.395  | 1.385  | 1.386                        |
| C <sub>im</sub> –C <sub>py(o)</sub>    | 1.429   | 1.440  | 1.426  | 1.427  | 1.439  | 1.423  | 1.427                        |
| C <sub>py(o)</sub> –C <sub>py(m)</sub> | 1.396   | 1.404  | 1.392  | 1.394  | 1.403  | 1.390  | 1.395                        |
| C <sub>py(m)</sub> –C <sub>py(p)</sub> | 1.403   | 1.410  | 1.401  | 1.400  | 1.408  | 1.399  | 1.403                        |
| N <sub>im</sub> –Al–N <sub>py</sub>    | 80.20   | 80.05  | 79.94  | 80.50  | 80.372 | 80.27  | 80.96                        |
| N <sub>im</sub> –Al–N <sub>im</sub> '  | 160.40  | 160.09 | 159.87 | 160.99 | 160.74 | 160.54 | 161.93                       |
| N <sub>im</sub> –Al–H                  | 99.80   | 99.95  | 100.06 | 99.50  | 99.63  | 99.73  | 99.00                        |
| N <sub>py</sub> –Al–H                  | 180.00  | 180.00 | 180.00 | 180.00 | 180.00 | 180.00 | 180.00                       |
| $\tau_4$                               | 0.14    | 0.14   | 0.14   | 0.13   | 0.14   | 0.14   | 0.13                         |
| Al–H stretching<br>vibration           | 1891    | 1835   | 1911   | 1925   | 1863   | 1970   | 1966                         |

**Table S3** Comparison of the key bond lengths (in Å), bond angles and dihedral angles (in degree) in the free (PhI<sub>2</sub>P)<sup>2-</sup> ligand and <sup>1</sup>(PhI<sub>2</sub>P)AlX complexes (X = H, , NH<sub>2</sub>, NHPH and NHDipp).

| ${}^1(\text{PhI}_2\text{P})\text{AlX}$                                                            | Free<br>( $\text{PhI}_2\text{P}$ ) $^{2-}$ | X = H |       | X = NH $_2$ |       | X = NHPH |       | X = NHDipp |       |
|---------------------------------------------------------------------------------------------------|--------------------------------------------|-------|-------|-------------|-------|----------|-------|------------|-------|
|                                                                                                   |                                            | SP    | TET   | SP          | TET   | SP       | TET   | SP         | TET   |
| $\text{N}_{\text{im}}-\text{C}_{\text{im}}$                                                       | 1.338                                      | 1.347 | 1.328 | 1.353       | 1.331 | 1.350    | 1.344 | 1.340      | 1.375 |
| $\text{C}_{\text{im}}-\text{C}_{\text{py(o)}}$                                                    | 1.479                                      | 1.422 | 1.454 | 1.422       | 1.452 | 1.423    | 1.438 | 1.430      | 1.415 |
| $\text{N}_{\text{py}}-\text{C}_{\text{py(o)}}$                                                    | 1.346                                      | 1.383 | 1.378 | 1.386       | 1.377 | 1.384    | 1.384 | 1.386      | 1.393 |
| $\text{C}_{\text{py(o)}}-\text{C}_{\text{py(m)}}$                                                 | 1.413                                      | 1.390 | 1.374 | 1.390       | 1.375 | 1.390    | 1.379 | 1.383      | 1.397 |
| $\text{C}_{\text{py(m)}}-\text{C}_{\text{py(p)}}$                                                 | 1.387                                      | 1.399 | 1.429 | 1.400       | 1.429 | 1.400    | 1.417 | 1.407      | 1.397 |
| $\text{N}_{\text{im}}-\text{C}_{\text{im}}-\text{C}_{\text{py(o)}}$                               | 116.1                                      | 112.7 | 114.7 | 112.9       | 114.6 | 113.4    | 114.0 | 113.6      | 113.6 |
| $\text{N}_{\text{im}'}-\text{C}_{\text{im}'}-\text{C}_{\text{py(o)'}}$                            | 116.1                                      | 112.7 | 115.5 | 112.9       | 116.1 | 112.4    | 114.7 | 113.4      | 114.2 |
| $\text{C}_{\text{im}}-\text{C}_{\text{py(o)}}-\text{N}_{\text{py}}$                               | 117.3                                      | 111.8 | 113.3 | 112.1       | 113.1 | 112.0    | 113.4 | 112.5      | 113.5 |
| $\text{C}_{\text{im}'}-\text{C}_{\text{py(o)'}}-\text{N}_{\text{py}}$                             | 117.3                                      | 111.8 | 114.6 | 112.1       | 114.6 | 112.1    | 113.8 | 113.1      | 113.3 |
| $\text{C}_{\text{py(o)}}-\text{N}_{\text{py}}-\text{C}_{\text{py(o)'}}$                           | 119.7                                      | 121.5 | 116.7 | 121.5       | 116.9 | 120.9    | 118.8 | 119.4      | 119.3 |
| $\text{N}_{\text{im}}-\text{C}_{\text{im}}-\text{C}_{\text{py(o)}}-\text{N}_{\text{py}}$          | 32.4                                       | 2.8   | 9.3   | 6.2         | 10.0  | 2.4      | 10.1  | 0.0        | 9.1   |
| $\text{N}_{\text{im}'}-\text{C}_{\text{im}'}-\text{C}_{\text{py(o)'}}-\text{N}_{\text{py}}$       | 32.4                                       | 2.8   | 2.7   | 6.1         | 4.4   | 4.1      | 6.8   | 5.2        | 8.4   |
| $\text{N}_{\text{py}}-\text{C}_{\text{py(o)}}-\text{C}_{\text{py(m)}}-\text{C}_{\text{py(p)}}$    | 1.4                                        | 3.0   | 2.6   | 1.3         | 2.5   | 0.1      | 10.0  | 0.4        | 12.5  |
| $\text{N}_{\text{py}}-\text{C}_{\text{py(o)'}}-\text{C}_{\text{py(m)'}}-\text{C}_{\text{py(p)'}}$ | 1.4                                        | 3.0   | 22.2  | 1.2         | 23.1  | 5.7      | 6.5   | 10.3       | 4.5   |

### S3: Nature bond orbital analysis

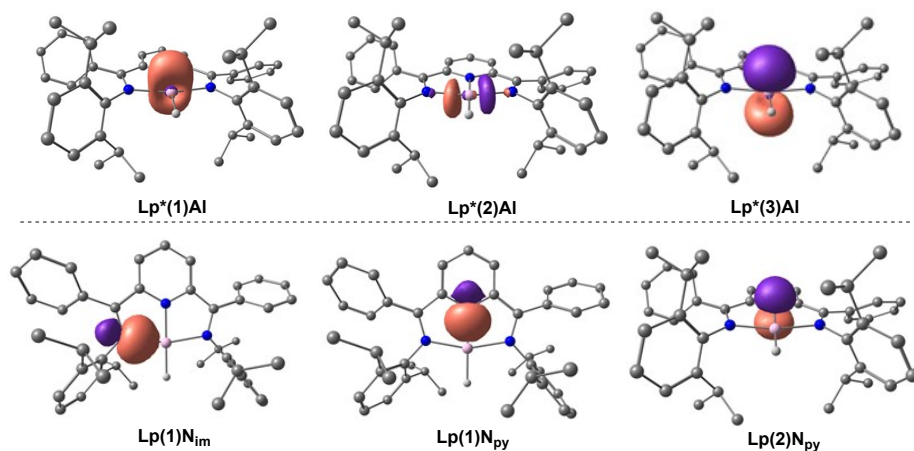

Fig.S2 The nature bond orbitals of  $\text{Lp}^*(n)\text{Al}$ ,  $\text{Lp}(n)\text{N}_{\text{im}}$  and  $\text{Lp}(n)\text{N}_{\text{py}}$  in the SP structure of the  ${}^1(\text{PhI}_2\text{P})\text{AlH}$  complex.

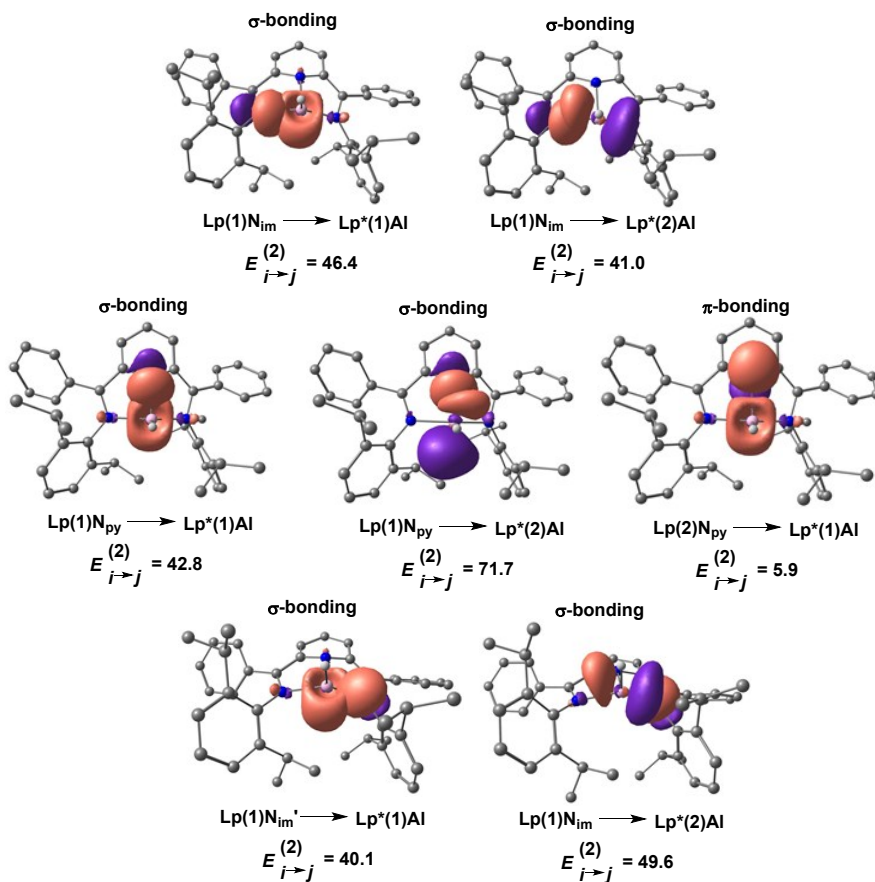

Fig. S3 NBO analysis showing  $\sigma$ - and  $\pi$ -interactions between the coordinating nitrogen atoms and the Al ion in the TET structure of the  $(\text{PhI}_2\text{P})\text{AlH}$  complex. The isodensity contour value is 0.05 a.u. All the second order perturbation energies are given in  $\text{kcal mol}^{-1}$ .

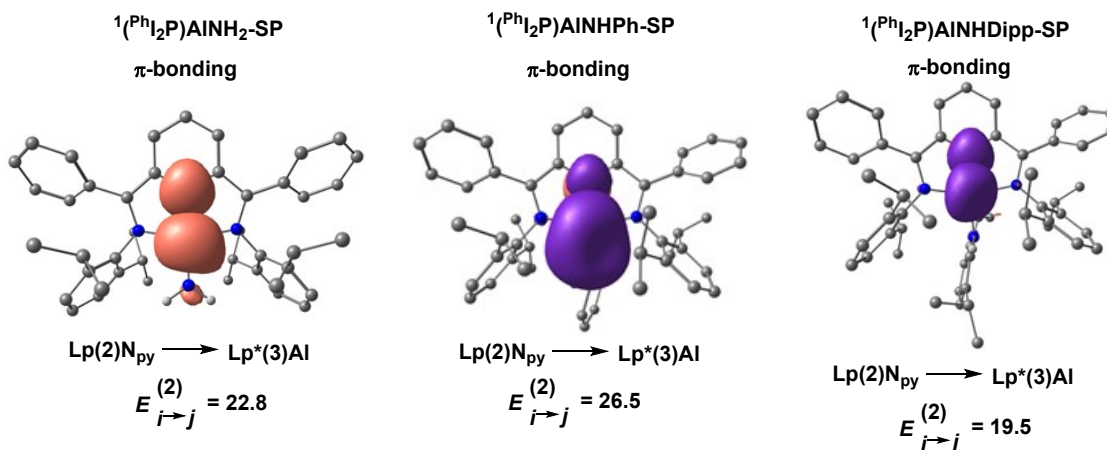

Fig. S4 NBO analysis showing  $\pi$ -interactions between the  $\text{N}_{\text{py}}$  nitrogen atoms and the  $\text{Al}^{\text{III}}$  ion in the SP structures of the  ${}^1(\text{PhI}_2\text{P})\text{AlNH}_2$ ,  ${}^1(\text{PhI}_2\text{P})\text{AlNHPh}$  and  ${}^1(\text{PhI}_2\text{P})\text{AlNHdipp}$  complexes. The isodensity contour value is 0.05 a.u. All the second order perturbation energies are given in  $\text{kcal mol}^{-1}$ .

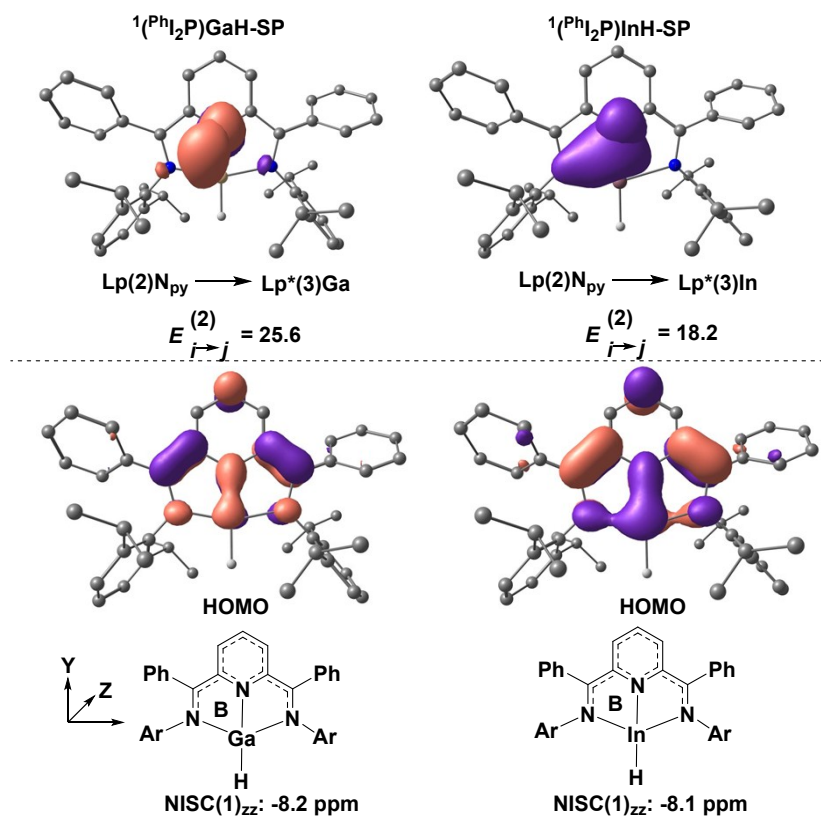

**Fig. S5** NBO and FMO analyses of the SP structure of the  ${}^1(\text{PhI}_2\text{P})\text{GaH}$  and  ${}^1(\text{PhI}_2\text{P})\text{InH}$  complexes. The isodensity contour value is 0.05 a.u. All the second order perturbation energies are given in  $\text{kcal mol}^{-1}$ .

#### S4: Summary of energy and spin-contamination of the optimized structures

Table S4 Electronic energy and spin-contamination  $\langle S^2 \rangle$  values of optimized structures

| Species                                            | $E_{ZPE}$ (a.u.) <sup>a</sup> | $E_{sln}$ (a.u.) <sup>b</sup> | $\langle S^2 \rangle$ |
|----------------------------------------------------|-------------------------------|-------------------------------|-----------------------|
| $^1(\text{PhI}_2\text{P})^{2-}$                    | 0.79634                       | -1830.97906                   | 0.00                  |
| $^3(\text{PhI}_2\text{P})^{2-}$                    | 0.79595                       | -1830.98461                   | 2.02                  |
| BS <sup>c</sup> - $^1(\text{PhI}_2\text{P})^{2-}$  | 0.79598                       | -1830.90792                   | 1.02                  |
| $^1(\text{PhI}_2\text{P})\text{AlH-SP}$            | 0.81309                       | -2073.95826                   | 0.00                  |
| $^1(\text{PhI}_2\text{P})\text{AlH-TET}$           | 0.81320                       | -2073.94459                   | 0.00                  |
| $^3(\text{PhI}_2\text{P})\text{AlH-SP}$            | 0.81249                       | -2073.94654                   | 2.00                  |
| BS- $^1(\text{PhI}_2\text{P})\text{AlH-SP}$        | 0.81305                       | -2073.95865                   | 0.29                  |
| $^1(\text{PhI}_2\text{P})\text{AlNH}_2\text{-SP}$  | 0.83286                       | -2129.36712                   | 0.00                  |
| $^1(\text{PhI}_2\text{P})\text{AlNH}_2\text{-TET}$ | 0.83205                       | -2129.34756                   | 0.00                  |
| $^1(\text{PhI}_2\text{P})\text{AlNHPh-SP}$         | 0.91603                       | -2360.37297                   | 0.00                  |
| $^1(\text{PhI}_2\text{P})\text{AlNHPh-TET}$        | 0.91477                       | -2360.38042                   | 0.00                  |
| $^1(\text{PhI}_2\text{P})\text{AlNHDIpp-SP}$       | 1.08933                       | -2596.19190                   | 0.00                  |
| $^1(\text{PhI}_2\text{P})\text{AlNHDIpp-TET}$      | 1.08705                       | -2596.21205                   | 0.00                  |
| $^1(\text{PhI}_2\text{P})\text{BH-SP}$             | 0.81843                       | -1856.31606                   | 0.00                  |
| $^1(\text{PhI}_2\text{P})\text{BH-T}$              | 0.82050                       | -1856.37651                   | 0.00                  |
| $^1(\text{PhI}_2\text{P})\text{GaH-SP}$            | 0.81183                       | -1833.55976                   | 0.00                  |
| $^1(\text{PhI}_2\text{P})\text{GaH-TET}$           | 0.81232                       | -1833.54535                   | 0.00                  |
| $^3(\text{PhI}_2\text{P})\text{GaH-SP}$            | 0.81145                       | -1833.54740                   | 2.02                  |
| BS- $^1(\text{PhI}_2\text{P})\text{GaH}$           | 0.81167                       | -1833.55989                   | 0.06                  |
| $^1(\text{PhI}_2\text{P})\text{InH-SP}$            | 0.80953                       | -1833.36215                   | 0.00                  |
| $^1(\text{PhI}_2\text{P})\text{InH-TET}$           | 0.81009                       | -1833.34397                   | 0.00                  |
| $^3(\text{PhI}_2\text{P})\text{InH-SP}$            | 0.80935                       | -1833.35402                   | 2.02                  |
| BS- $^1(\text{PhI}_2\text{P})\text{InH}$           | 0.80961                       | -1833.36284                   | 0.25                  |
| $^1(\text{PhI}_2\text{P})\text{TIH-SP}$            | 0.80764                       | -1882.88800                   | 0.00                  |
| $^1(\text{PhI}_2\text{P})\text{TIH-T}$             | 0.81002                       | -1882.93506                   | 0.00                  |

*a:*  $E_{ZPE}$  is the Zero-point correction calculated in gas phase at the M06-2X/6-31G\* level

*b:*  $E_{sln}$  is the single point energy after PCM correction calculated at the M06-2X/(SMD,THF)/6-311++G(d,p) level

*c:* BS represents for the open-shell singlet state

### S5: Cartesian coordinates of the optimized structures.



| $1^{(\text{PhI}_2\text{P})^{2-}}$ : |              |              |              |   |              |              |              |
|-------------------------------------|--------------|--------------|--------------|---|--------------|--------------|--------------|
|                                     |              |              |              | 1 | 4.788097000  | -2.391286000 | 3.373399000  |
| 7                                   | 2.162870000  | -0.030080000 | 0.523485000  | 6 | 5.229038000  | -2.778563000 | 1.308626000  |
| 7                                   | -0.152235000 | 1.219609000  | -0.262261000 | 1 | 6.009027000  | -3.502382000 | 1.529778000  |
| 7                                   | -2.433907000 | -0.157832000 | -0.922118000 | 6 | 4.899792000  | -2.477805000 | -0.005277000 |
| 6                                   | 2.234280000  | 1.138526000  | -0.001542000 | 1 | 5.423826000  | -2.978530000 | -0.817757000 |
| 6                                   | 0.966441000  | 1.919498000  | -0.184868000 | 6 | 3.908480000  | -1.544792000 | -0.320814000 |
| 6                                   | 1.074646000  | 3.317244000  | -0.157821000 | 6 | 2.728915000  | -0.555023000 | 3.184881000  |
| 1                                   | 2.027439000  | 3.821848000  | -0.056006000 | 1 | 2.643910000  | 0.508367000  | 2.924105000  |
| 6                                   | -0.149539000 | 4.026846000  | -0.229869000 | 6 | 3.388054000  | -0.647686000 | 4.561234000  |
| 1                                   | -0.150027000 | 5.116064000  | -0.258351000 | 1 | 4.422241000  | -0.284378000 | 4.546443000  |
| 6                                   | -1.330112000 | 3.342631000  | -0.310585000 | 1 | 3.396545000  | -1.681067000 | 4.928747000  |
| 1                                   | -2.254190000 | 3.895091000  | -0.443782000 | 1 | 2.822553000  | -0.050151000 | 5.283770000  |
| 6                                   | -1.369161000 | 1.897513000  | -0.296519000 | 6 | 1.300707000  | -1.121399000 | 3.235552000  |
| 6                                   | -2.550220000 | 1.141357000  | -0.436440000 | 1 | 0.791363000  | -0.965818000 | 2.281463000  |
| 6                                   | 3.517668000  | 1.764058000  | -0.451808000 | 1 | 0.720336000  | -0.624546000 | 4.021427000  |
| 6                                   | 4.690576000  | 1.682051000  | 0.309289000  | 1 | 1.331845000  | -2.194794000 | 3.458232000  |
| 1                                   | 4.668042000  | 1.168914000  | 1.266180000  | 6 | 3.568904000  | -1.281671000 | -1.777849000 |
| 6                                   | 5.875867000  | 2.251135000  | -0.143603000 | 1 | 2.785436000  | -0.520175000 | -1.815760000 |
| 1                                   | 6.773292000  | 2.181592000  | 0.465226000  | 6 | 4.785526000  | -0.759113000 | -2.551965000 |
| 6                                   | 5.913386000  | 2.908131000  | -1.375939000 | 1 | 5.227161000  | 0.113395000  | -2.060404000 |
| 1                                   | 6.841624000  | 3.346349000  | -1.733777000 | 1 | 4.496169000  | -0.471768000 | -3.569572000 |
| 6                                   | 4.755025000  | 2.994011000  | -2.142905000 | 1 | 5.558531000  | -1.534573000 | -2.631441000 |
| 1                                   | 4.775765000  | 3.499875000  | -3.104763000 | 6 | 3.000287000  | -2.542168000 | -2.440262000 |
| 6                                   | 3.564996000  | 2.429846000  | -1.687823000 | 1 | 2.101945000  | -2.882295000 | -1.918521000 |
| 1                                   | 2.658342000  | 2.493882000  | -2.280090000 | 1 | 3.737528000  | -3.355187000 | -2.433756000 |
| 6                                   | -3.872711000 | 1.746073000  | -0.314050000 | 1 | 2.728214000  | -2.338184000 | -3.482055000 |
| 6                                   | -4.976229000 | 1.193940000  | -1.018705000 | 6 | -3.101677000 | -1.224343000 | -0.485760000 |
| 1                                   | -4.786973000 | 0.342279000  | -1.663893000 | 6 | -3.814508000 | -1.428622000 | 0.762722000  |
| 6                                   | -6.255588000 | 1.715019000  | -0.905381000 | 6 | -4.539903000 | -2.599979000 | 0.969728000  |
| 1                                   | -7.063079000 | 1.261931000  | -1.479202000 | 1 | -5.070799000 | -2.709672000 | 1.918507000  |
| 6                                   | -6.528171000 | 2.799712000  | -0.064175000 | 6 | -4.591186000 | -3.646307000 | 0.053518000  |
| 1                                   | -7.536239000 | 3.195643000  | 0.032756000  | 1 | -5.173509000 | -4.543537000 | 0.249070000  |
| 6                                   | -5.470301000 | 3.332466000  | 0.676794000  | 6 | -3.820685000 | -3.515868000 | -1.111149000 |
| 1                                   | -5.655096000 | 4.146409000  | 1.377381000  | 1 | -3.805185000 | -4.340675000 | -1.823720000 |
| 6                                   | -4.186989000 | 2.815038000  | 0.567684000  | 6 | -3.083876000 | -2.378992000 | -1.381368000 |
| 1                                   | -3.406118000 | 3.204339000  | 1.214977000  | 6 | -3.678077000 | -0.475591000 | 1.945453000  |
| 6                                   | 3.229333000  | -0.898467000 | 0.733507000  | 1 | -3.072985000 | 0.376369000  | 1.632099000  |
| 6                                   | 3.531629000  | -1.226260000 | 2.081634000  | 6 | -2.919957000 | -1.148223000 | 3.100392000  |
| 6                                   | 4.537671000  | -2.149745000 | 2.343909000  | 1 | -1.944751000 | -1.506345000 | 2.756849000  |
|                                     |              |              |              | 1 | -3.477236000 | -2.010360000 | 3.489849000  |



|                                                                    |              |              |              |   |              |              |              |
|--------------------------------------------------------------------|--------------|--------------|--------------|---|--------------|--------------|--------------|
| 1                                                                  | -3.929911000 | -0.091075000 | -3.080822000 | 1 | 1.946052000  | 4.002767000  | -0.559880000 |
| 1                                                                  | -3.696557000 | -1.312564000 | -1.812305000 | 6 | -0.187436000 | 4.003713000  | -0.894388000 |
| 6                                                                  | 1.840578000  | -2.675259000 | -1.001948000 | 1 | -0.242159000 | 5.065050000  | -1.132784000 |
| 6                                                                  | 3.005267000  | -2.079293000 | -1.577984000 | 6 | -1.338162000 | 3.228605000  | -0.889382000 |
| 6                                                                  | 3.601348000  | -2.676179000 | -2.688394000 | 1 | -2.302597000 | 3.651660000  | -1.150004000 |
| 1                                                                  | 4.487489000  | -2.205569000 | -3.115056000 | 6 | -1.234770000 | 1.860247000  | -0.560650000 |
| 6                                                                  | 3.096231000  | -3.828740000 | -3.279924000 | 6 | -2.427013000 | 0.980344000  | -0.586621000 |
| 1                                                                  | 3.587923000  | -4.275680000 | -4.140334000 | 6 | 3.597860000  | 1.854616000  | -0.488818000 |
| 6                                                                  | 1.926182000  | -4.382966000 | -2.757660000 | 6 | 4.830541000  | 1.687100000  | 0.203147000  |
| 1                                                                  | 1.508360000  | -5.272519000 | -3.224915000 | 1 | 4.820139000  | 1.225453000  | 1.185062000  |
| 6                                                                  | 1.290139000  | -3.828488000 | -1.655577000 | 6 | 6.034161000  | 2.105311000  | -0.340365000 |
| 6                                                                  | 3.547595000  | -0.740893000 | -1.096349000 | 1 | 6.948800000  | 1.961251000  | 0.232409000  |
| 1                                                                  | 2.961208000  | -0.424610000 | -0.231590000 | 6 | 6.093522000  | 2.704695000  | -1.603416000 |
| 6                                                                  | 3.358337000  | 0.334106000  | -2.175543000 | 1 | 7.042099000  | 3.020467000  | -2.029280000 |
| 1                                                                  | 2.303148000  | 0.420980000  | -2.449654000 | 6 | 4.894482000  | 2.875069000  | -2.307195000 |
| 1                                                                  | 3.929911000  | 0.091075000  | -3.080822000 | 1 | 4.908451000  | 3.320206000  | -3.300826000 |
| 1                                                                  | 3.696557000  | 1.312564000  | -1.812305000 | 6 | 3.685642000  | 2.463112000  | -1.772070000 |
| 6                                                                  | 5.018400000  | -0.824151000 | -0.669982000 | 1 | 2.777724000  | 2.575114000  | -2.357738000 |
| 1                                                                  | 5.168827000  | -1.596460000 | 0.090146000  | 6 | -3.735791000 | 1.527661000  | -0.267027000 |
| 1                                                                  | 5.353342000  | 0.135433000  | -0.256698000 | 6 | -4.928289000 | 0.959714000  | -0.797498000 |
| 1                                                                  | 5.660981000  | -1.057427000 | -1.529968000 | 1 | -4.848129000 | 0.125890000  | -1.487216000 |
| 6                                                                  | 0.000000000  | -4.399900000 | -1.094657000 | 6 | -6.180224000 | 1.449585000  | -0.463106000 |
| 1                                                                  | 0.104739000  | -4.397797000 | -0.001988000 | 1 | -7.061758000 | 0.985011000  | -0.901814000 |
| 6                                                                  | -0.297580000 | -5.829243000 | -1.548889000 | 6 | -6.329423000 | 2.522358000  | 0.422871000  |
| 1                                                                  | -1.176707000 | -6.216303000 | -1.020504000 | 1 | -7.314686000 | 2.894551000  | 0.690438000  |
| 1                                                                  | 0.546058000  | -6.501750000 | -1.355226000 | 6 | -5.170878000 | 3.094625000  | 0.963389000  |
| 1                                                                  | -0.519923000 | -5.868823000 | -2.622724000 | 1 | -5.253224000 | 3.917967000  | 1.671162000  |
| 6                                                                  | -1.183015000 | -3.477962000 | -1.427079000 | 6 | -3.914602000 | 2.614825000  | 0.633358000  |
| 1                                                                  | -0.991536000 | -2.479263000 | -1.026685000 | 1 | -3.036944000 | 3.055557000  | 1.097471000  |
| 1                                                                  | -2.113839000 | -3.863074000 | -0.989824000 | 6 | 3.157074000  | -0.593927000 | 1.183970000  |
| 1                                                                  | -1.317673000 | -3.413402000 | -2.514391000 | 6 | 3.471138000  | -0.933843000 | 2.542041000  |
|                                                                    |              |              |              | 6 | 4.368784000  | -1.955217000 | 2.821839000  |
|                                                                    |              |              |              | 1 | 4.614620000  | -2.182387000 | 3.857273000  |
|                                                                    |              |              |              | 6 | 4.970418000  | -2.696449000 | 1.803500000  |
|                                                                    |              |              |              | 1 | 5.676210000  | -3.490083000 | 2.035437000  |
|                                                                    |              |              |              | 6 | 4.624213000  | -2.411629000 | 0.487236000  |
|                                                                    |              |              |              | 1 | 5.050132000  | -3.013883000 | -0.315554000 |
|                                                                    |              |              |              | 6 | 3.731213000  | -1.395654000 | 0.149155000  |
|                                                                    |              |              |              | 6 | 2.783889000  | -0.138661000 | 3.637976000  |
|                                                                    |              |              |              | 1 | 2.807211000  | 0.913045000  | 3.324536000  |
| BS <sup>-1</sup> ( <sup>Ph</sup> I <sub>2</sub> P) <sup>2-</sup> : |              |              |              |   |              |              |              |
| 7                                                                  | 2.252669000  | 0.408931000  | 0.991460000  |   |              |              |              |
| 7                                                                  | -0.047668000 | 1.288677000  | -0.284432000 |   |              |              |              |
| 7                                                                  | -2.220031000 | -0.273388000 | -1.007406000 |   |              |              |              |
| 6                                                                  | 2.343593000  | 1.373375000  | 0.067529000  |   |              |              |              |
| 6                                                                  | 1.071369000  | 2.036412000  | -0.304756000 |   |              |              |              |
| 6                                                                  | 1.033398000  | 3.417110000  | -0.593651000 |   |              |              |              |



|   |              |              |              |                                                        |              |              |              |
|---|--------------|--------------|--------------|--------------------------------------------------------|--------------|--------------|--------------|
| 6 | -0.732391000 | -6.324855000 | -2.633384000 | 1                                                      | -0.161873000 | -5.365962000 | 4.073077000  |
| 1 | -0.903702000 | -7.340229000 | -2.976890000 | 6                                                      | 1.056456000  | -4.031139000 | 2.907573000  |
| 6 | -1.497508000 | -5.276254000 | -3.136335000 | 1                                                      | 1.952182000  | -4.225392000 | 3.492278000  |
| 1 | -2.276802000 | -5.469932000 | -3.866976000 | 6                                                      | 1.122850000  | -3.135289000 | 1.838706000  |
| 6 | -1.283660000 | -3.977426000 | -2.685538000 | 6                                                      | -2.550869000 | -3.253941000 | 0.668906000  |
| 1 | -1.913890000 | -3.168512000 | -3.043017000 | 1                                                      | -2.319646000 | -2.655010000 | -0.216188000 |
| 6 | 0.046605000  | 2.895246000  | 1.090743000  | 6                                                      | -3.498524000 | -2.425353000 | 1.545632000  |
| 6 | -1.122850000 | 3.135289000  | 1.838706000  | 1                                                      | -3.023358000 | -1.488304000 | 1.855470000  |
| 6 | -1.056456000 | 4.031139000  | 2.907573000  | 1                                                      | -3.772319000 | -2.977296000 | 2.451793000  |
| 1 | -1.952182000 | 4.225392000  | 3.492278000  | 1                                                      | -4.418823000 | -2.185778000 | 1.001991000  |
| 6 | 0.129079000  | 4.673628000  | 3.237424000  | 6                                                      | -3.221959000 | -4.546316000 | 0.190686000  |
| 1 | 0.161873000  | 5.365962000  | 4.073077000  | 1                                                      | -2.520110000 | -5.170528000 | -0.371642000 |
| 6 | 1.274421000  | 4.419457000  | 2.494362000  | 1                                                      | -4.073846000 | -4.314222000 | -0.457339000 |
| 1 | 2.205637000  | 4.913297000  | 2.759567000  | 1                                                      | -3.600539000 | -5.133497000 | 1.034637000  |
| 6 | 1.258218000  | 3.533058000  | 1.416753000  | 6                                                      | 2.452695000  | -2.468789000 | 1.519280000  |
| 6 | -2.452695000 | 2.468789000  | 1.519280000  | 1                                                      | 2.318519000  | -1.851625000 | 0.624370000  |
| 1 | -2.318519000 | 1.851625000  | 0.624370000  | 6                                                      | 3.546394000  | -3.498625000 | 1.207376000  |
| 6 | -3.546394000 | 3.498625000  | 1.207376000  | 1                                                      | 4.481485000  | -2.990549000 | 0.949964000  |
| 1 | -3.270237000 | 4.143072000  | 0.367092000  | 1                                                      | 3.270237000  | -4.143072000 | 0.367092000  |
| 1 | -3.743764000 | 4.140812000  | 2.072420000  | 1                                                      | 3.743764000  | -4.140812000 | 2.072420000  |
| 1 | -4.481485000 | 2.990549000  | 0.949964000  | 6                                                      | 2.897762000  | -1.554032000 | 2.667079000  |
| 6 | -2.897762000 | 1.554032000  | 2.667079000  | 1                                                      | 2.132335000  | -0.806150000 | 2.892803000  |
| 1 | -2.132335000 | 0.806150000  | 2.892803000  | 1                                                      | 3.828217000  | -1.037593000 | 2.406538000  |
| 1 | -3.828217000 | 1.037593000  | 2.406538000  | 1                                                      | 3.080951000  | -2.135503000 | 3.577743000  |
| 1 | -3.080951000 | 2.135503000  | 3.577743000  | 1                                                      | 0.000000000  | 0.000000000  | 1.946987000  |
| 6 | 2.550869000  | 3.253941000  | 0.668906000  | <sup>1</sup> ( <sup>Ph</sup> I <sub>2</sub> P)AIH-TET: |              |              |              |
| 1 | 2.319646000  | 2.655010000  | -0.216188000 | 13                                                     | 0.048238000  | -0.215260000 | -1.014969000 |
| 6 | 3.221959000  | 4.546316000  | 0.190686000  | 7                                                      | 1.813488000  | -0.024581000 | -0.111971000 |
| 1 | 2.520110000  | 5.170528000  | -0.371642000 | 7                                                      | 0.138691000  | 1.630157000  | -1.120270000 |
| 1 | 4.073846000  | 4.314222000  | -0.457339000 | 7                                                      | -1.773349000 | -0.010051000 | -0.576520000 |
| 1 | 3.600539000  | 5.133497000  | 1.034637000  | 6                                                      | 2.208841000  | 1.241174000  | -0.044398000 |
| 6 | 3.498524000  | 2.425353000  | 1.545632000  | 6                                                      | 1.227187000  | 2.209597000  | -0.505829000 |
| 1 | 3.023358000  | 1.488304000  | 1.855470000  | 6                                                      | 1.241146000  | 3.561692000  | -0.259815000 |
| 1 | 3.772319000  | 2.977296000  | 2.451793000  | 1                                                      | 2.075061000  | 4.034320000  | 0.245599000  |
| 1 | 4.418823000  | 2.185778000  | 1.001991000  | 6                                                      | 0.076463000  | 4.312835000  | -0.609525000 |
| 6 | -0.046605000 | -2.895246000 | 1.090743000  | 1                                                      | 0.095310000  | 5.394813000  | -0.539415000 |
| 6 | -1.258218000 | -3.533058000 | 1.416753000  | 6                                                      | -1.102921000 | 3.660106000  | -0.878653000 |
| 6 | -1.274421000 | -4.419457000 | 2.494362000  | 1                                                      | -2.025330000 | 4.220225000  | -0.999208000 |
| 1 | -2.205637000 | -4.913297000 | 2.759567000  | 6                                                      | -1.114173000 | 2.233433000  | -0.897532000 |
| 6 | -0.129079000 | -4.673628000 | 3.237424000  |                                                        |              |              |              |

|   |              |              |              |   |              |              |              |
|---|--------------|--------------|--------------|---|--------------|--------------|--------------|
| 6 | -2.144175000 | 1.344842000  | -0.636757000 | 1 | -0.920354000 | -2.626047000 | 1.975162000  |
| 6 | 3.536169000  | 1.670252000  | 0.437451000  | 1 | 0.298230000  | -3.816003000 | 1.456058000  |
| 6 | 4.114278000  | 1.091739000  | 1.576105000  | 6 | 4.107226000  | -0.460454000 | -1.966300000 |
| 1 | 3.578654000  | 0.316049000  | 2.114810000  | 1 | 3.450538000  | 0.413410000  | -1.950716000 |
| 6 | 5.361142000  | 1.513675000  | 2.019123000  | 6 | 5.558929000  | 0.033855000  | -1.914611000 |
| 1 | 5.796425000  | 1.062330000  | 2.904933000  | 1 | 5.803720000  | 0.460846000  | -0.937343000 |
| 6 | 6.051557000  | 2.512062000  | 1.331670000  | 1 | 5.726318000  | 0.799796000  | -2.679094000 |
| 1 | 7.028367000  | 2.834390000  | 1.678332000  | 1 | 6.258343000  | -0.786092000 | -2.111793000 |
| 6 | 5.487766000  | 3.087980000  | 0.196475000  | 6 | 3.828156000  | -1.202688000 | -3.280022000 |
| 1 | 6.025537000  | 3.855341000  | -0.351290000 | 1 | 2.780028000  | -1.508913000 | -3.338678000 |
| 6 | 4.239399000  | 2.668820000  | -0.251659000 | 1 | 4.454526000  | -2.097834000 | -3.362768000 |
| 1 | 3.812183000  | 3.091056000  | -1.155934000 | 1 | 4.048789000  | -0.554918000 | -4.134873000 |
| 6 | -3.553175000 | 1.767721000  | -0.514571000 | 6 | -2.628431000 | -1.016419000 | -0.035080000 |
| 6 | -4.573196000 | 1.043082000  | -1.148510000 | 6 | -3.108981000 | -0.956232000 | 1.293084000  |
| 1 | -4.311586000 | 0.164939000  | -1.730602000 | 6 | -3.830701000 | -2.040534000 | 1.797723000  |
| 6 | -5.899875000 | 1.443389000  | -1.047445000 | 1 | -4.194771000 | -1.998942000 | 2.821367000  |
| 1 | -6.673452000 | 0.868314000  | -1.547276000 | 6 | -4.075258000 | -3.174171000 | 1.034803000  |
| 6 | -6.237870000 | 2.581615000  | -0.316093000 | 1 | -4.624207000 | -4.011569000 | 1.454466000  |
| 1 | -7.274865000 | 2.893416000  | -0.238995000 | 6 | -3.620595000 | -3.215501000 | -0.275390000 |
| 6 | -5.237523000 | 3.307354000  | 0.324457000  | 1 | -3.824393000 | -4.091341000 | -0.886647000 |
| 1 | -5.491813000 | 4.181760000  | 0.916036000  | 6 | -2.916195000 | -2.147696000 | -0.834039000 |
| 6 | -3.910819000 | 2.896051000  | 0.238768000  | 6 | -2.861574000 | 0.219794000  | 2.226933000  |
| 1 | -3.145130000 | 3.425311000  | 0.798096000  | 1 | -2.348705000 | 1.010280000  | 1.674857000  |
| 6 | 2.694134000  | -1.134611000 | 0.089605000  | 6 | -1.949918000 | -0.174930000 | 3.395155000  |
| 6 | 2.384188000  | -2.054102000 | 1.111457000  | 1 | -0.964144000 | -0.483224000 | 3.035209000  |
| 6 | 3.208111000  | -3.165507000 | 1.284013000  | 1 | -2.376507000 | -1.005584000 | 3.969451000  |
| 1 | 2.982938000  | -3.878767000 | 2.071206000  | 1 | -1.812672000 | 0.671386000  | 4.076908000  |
| 6 | 4.307084000  | -3.376777000 | 0.461504000  | 6 | -4.187924000 | 0.785711000  | 2.754085000  |
| 1 | 4.941342000  | -4.245312000 | 0.608775000  | 1 | -4.896952000 | 0.961877000  | 1.940207000  |
| 6 | 4.577592000  | -2.479429000 | -0.561319000 | 1 | -4.018805000 | 1.734176000  | 3.275512000  |
| 1 | 5.421303000  | -2.660685000 | -1.221688000 | 1 | -4.651513000 | 0.094145000  | 3.466856000  |
| 6 | 3.783076000  | -1.350966000 | -0.777945000 | 6 | -2.499288000 | -2.243091000 | -2.294420000 |
| 6 | 1.145772000  | -1.887537000 | 1.975315000  | 1 | -2.038480000 | -1.293364000 | -2.580332000 |
| 1 | 0.836877000  | -0.836685000 | 1.921237000  | 6 | -3.711329000 | -2.463420000 | -3.210142000 |
| 6 | 1.388630000  | -2.217093000 | 3.451273000  | 1 | -3.398242000 | -2.452798000 | -4.259188000 |
| 1 | 2.235549000  | -1.652145000 | 3.853095000  | 1 | -4.468710000 | -1.685552000 | -3.072416000 |
| 1 | 1.590762000  | -3.282787000 | 3.598542000  | 1 | -4.187961000 | -3.430064000 | -3.014626000 |
| 1 | 0.499625000  | -1.972246000 | 4.040929000  | 6 | -1.471657000 | -3.360295000 | -2.513593000 |
| 6 | 0.011749000  | -2.759063000 | 1.415979000  | 1 | -0.585749000 | -3.228477000 | -1.885006000 |
| 1 | -0.204584000 | -2.536149000 | 0.361529000  | 1 | -1.138588000 | -3.375567000 | -3.556496000 |

|                                        |              |              |              |   |              |              |              |
|----------------------------------------|--------------|--------------|--------------|---|--------------|--------------|--------------|
| 1                                      | -1.908009000 | -4.338415000 | -2.280227000 | 1 | -3.353257000 | 3.134704000  | 1.427780000  |
| 1                                      | 0.448072000  | -0.846579000 | -2.416637000 | 6 | 2.821387000  | -1.094452000 | 0.303871000  |
| $^3(\text{PhI}_2\text{P})\text{AlH}$ : |              |              |              | 6 | 2.882623000  | -1.879771000 | 1.472179000  |
| 13                                     | -0.000014000 | -0.341319000 | 0.000044000  | 6 | 3.782881000  | -2.946597000 | 1.512843000  |
| 7                                      | 1.888448000  | -0.017213000 | 0.248418000  | 1 | 3.845034000  | -3.554274000 | 2.412241000  |
| 7                                      | -0.000006000 | 1.579717000  | 0.000043000  | 6 | 4.598088000  | -3.243140000 | 0.429249000  |
| 7                                      | -1.888456000 | -0.017205000 | -0.248436000 | 1 | 5.293074000  | -4.075718000 | 0.479215000  |
| 6                                      | 2.286179000  | 1.285698000  | 0.195441000  | 6 | 4.510445000  | -2.473172000 | -0.723604000 |
| 6                                      | 1.196424000  | 2.215427000  | 0.097197000  | 1 | 5.135177000  | -2.717018000 | -1.578905000 |
| 6                                      | 1.212635000  | 3.628808000  | 0.133067000  | 6 | 3.627103000  | -1.397006000 | -0.810911000 |
| 1                                      | 2.141210000  | 4.166106000  | 0.272616000  | 6 | 2.026083000  | -1.597154000 | 2.697327000  |
| 6                                      | 0.000000000  | 4.299243000  | 0.000037000  | 1 | 1.376660000  | -0.743804000 | 2.471289000  |
| 1                                      | 0.000001000  | 5.385622000  | 0.000041000  | 6 | 2.886956000  | -1.203755000 | 3.904738000  |
| 6                                      | -1.212638000 | 3.628814000  | -0.133004000 | 1 | 3.488315000  | -0.313335000 | 3.697098000  |
| 1                                      | -2.141208000 | 4.166117000  | -0.272563000 | 1 | 3.569400000  | -2.015347000 | 4.179672000  |
| 6                                      | -1.196431000 | 2.215433000  | -0.097140000 | 1 | 2.253333000  | -0.989925000 | 4.771776000  |
| 6                                      | -2.286186000 | 1.285708000  | -0.195436000 | 6 | 1.132803000  | -2.794547000 | 3.042185000  |
| 6                                      | 3.690080000  | 1.732555000  | 0.173740000  | 1 | 0.504957000  | -3.073686000 | 2.191035000  |
| 6                                      | 4.667616000  | 1.172620000  | 1.010854000  | 1 | 0.485085000  | -2.555146000 | 3.892618000  |
| 1                                      | 4.389684000  | 0.397037000  | 1.716025000  | 1 | 1.735270000  | -3.666592000 | 3.319189000  |
| 6                                      | 5.988980000  | 1.599026000  | 0.941927000  | 6 | 3.523151000  | -0.628514000 | -2.117541000 |
| 1                                      | 6.727864000  | 1.153999000  | 1.601083000  | 1 | 2.910966000  | 0.261568000  | -1.951308000 |
| 6                                      | 6.366358000  | 2.589015000  | 0.036619000  | 6 | 4.892107000  | -0.155773000 | -2.618115000 |
| 1                                      | 7.399738000  | 2.917192000  | -0.015226000 | 1 | 5.427501000  | 0.395374000  | -1.838153000 |
| 6                                      | 5.408708000  | 3.148192000  | -0.806393000 | 1 | 4.771614000  | 0.502550000  | -3.484979000 |
| 1                                      | 5.693263000  | 3.907467000  | -1.528427000 | 1 | 5.515977000  | -1.000353000 | -2.930677000 |
| 6                                      | 4.087306000  | 2.721628000  | -0.741899000 | 6 | 2.807338000  | -1.484638000 | -3.170433000 |
| 1                                      | 3.353197000  | 3.134729000  | -1.427766000 | 1 | 1.814885000  | -1.787837000 | -2.817837000 |
| 6                                      | -3.690087000 | 1.732561000  | -0.173764000 | 1 | 3.376720000  | -2.396299000 | -3.383126000 |
| 6                                      | -4.667596000 | 1.172638000  | -1.010917000 | 1 | 2.689543000  | -0.929733000 | -4.107514000 |
| 1                                      | -4.389636000 | 0.397072000  | -1.716099000 | 6 | -2.821400000 | -1.094440000 | -0.303884000 |
| 6                                      | -5.988964000 | 1.599032000  | -0.942018000 | 6 | -3.627101000 | -1.396999000 | 0.810908000  |
| 1                                      | -6.727827000 | 1.154013000  | -1.601203000 | 6 | -4.510436000 | -2.473171000 | 0.723613000  |
| 6                                      | -6.366374000 | 2.588999000  | -0.036698000 | 1 | -5.135155000 | -2.717022000 | 1.578922000  |
| 1                                      | -7.399759000 | 2.917166000  | 0.015126000  | 6 | -4.598086000 | -3.243142000 | -0.429238000 |
| 6                                      | -5.408751000 | 3.148166000  | 0.806351000  | 1 | -5.293064000 | -4.075728000 | -0.479193000 |
| 1                                      | -5.693331000 | 3.907425000  | 1.528392000  | 6 | -3.782896000 | -2.946594000 | -1.512842000 |
| 6                                      | -4.087344000 | 2.721613000  | 0.741884000  | 1 | -3.845052000 | -3.554275000 | -2.412238000 |
|                                        |              |              |              | 6 | -2.882648000 | -1.879758000 | -1.472191000 |
|                                        |              |              |              | 6 | -3.523131000 | -0.628512000 | 2.117540000  |

|                                                        |              |              |              |   |              |              |              |
|--------------------------------------------------------|--------------|--------------|--------------|---|--------------|--------------|--------------|
| 1                                                      | -2.910960000 | 0.261578000  | 1.951300000  | 6 | -0.234489000 | 6.065936000  | -1.664575000 |
| 6                                                      | -2.807285000 | -1.484633000 | 3.170413000  | 1 | -0.826877000 | 6.879071000  | -1.256793000 |
| 1                                                      | -1.814838000 | -1.787821000 | 2.817792000  | 6 | 0.741708000  | 6.325928000  | -2.625194000 |
| 1                                                      | -3.376654000 | -2.396301000 | 3.383113000  | 1 | 0.915552000  | 7.341876000  | -2.965696000 |
| 1                                                      | -2.689475000 | -0.929732000 | 4.107493000  | 6 | 1.498936000  | 5.275622000  | -3.136818000 |
| 6                                                      | -4.892082000 | -0.155787000 | 2.618142000  | 1 | 2.274871000  | 5.468584000  | -3.871246000 |
| 1                                                      | -5.427495000 | 0.395359000  | 1.838192000  | 6 | 1.281632000  | 3.976135000  | -2.690187000 |
| 1                                                      | -4.771580000 | 0.502533000  | 3.485007000  | 1 | 1.905839000  | 3.166087000  | -3.055794000 |
| 1                                                      | -5.515938000 | -1.000374000 | 2.930711000  | 6 | -0.290928000 | -3.698969000 | -1.734839000 |
| 6                                                      | -2.026111000 | -1.597141000 | -2.697340000 | 6 | 0.458932000  | -4.767621000 | -1.222573000 |
| 1                                                      | -1.376771000 | -0.743718000 | -2.471340000 | 1 | 1.218749000  | -4.576599000 | -0.472615000 |
| 6                                                      | -2.886985000 | -1.203902000 | -3.904802000 | 6 | 0.234489000  | -6.065936000 | -1.664575000 |
| 1                                                      | -2.253353000 | -0.990045000 | -4.771827000 | 1 | 0.826877000  | -6.879071000 | -1.256793000 |
| 1                                                      | -3.488455000 | -0.313540000 | -3.697231000 | 6 | -0.741708000 | -6.325928000 | -2.625194000 |
| 1                                                      | -3.569327000 | -2.015584000 | -4.179723000 | 1 | -0.915552000 | -7.341876000 | -2.965696000 |
| 6                                                      | -1.132720000 | -2.794483000 | -3.042093000 | 6 | -1.498936000 | -5.275622000 | -3.136818000 |
| 1                                                      | -0.504864000 | -3.073506000 | -2.190911000 | 1 | -2.274871000 | -5.468584000 | -3.871246000 |
| 1                                                      | -0.485010000 | -2.555095000 | -3.892535000 | 6 | -1.281632000 | -3.976135000 | -2.690187000 |
| 1                                                      | -1.735113000 | -3.666600000 | -3.319033000 | 1 | -1.905839000 | -3.166087000 | -3.055794000 |
| 1                                                      | -0.000031000 | -1.927730000 | 0.000167000  | 6 | 0.046350000  | 2.885936000  | 1.091288000  |
|                                                        |              |              |              | 6 | -1.121867000 | 3.120310000  | 1.842983000  |
|                                                        |              |              |              | 6 | -1.056967000 | 4.016659000  | 2.911602000  |
|                                                        |              |              |              | 1 | -1.952135000 | 4.207097000  | 3.498442000  |
|                                                        |              |              |              | 6 | 0.126381000  | 4.664722000  | 3.238217000  |
|                                                        |              |              |              | 1 | 0.158059000  | 5.357623000  | 4.073445000  |
|                                                        |              |              |              | 6 | 1.271231000  | 4.414951000  | 2.492786000  |
|                                                        |              |              |              | 1 | 2.201023000  | 4.912472000  | 2.756076000  |
|                                                        |              |              |              | 6 | 1.256164000  | 3.528357000  | 1.415407000  |
|                                                        |              |              |              | 6 | -2.449805000 | 2.448230000  | 1.527385000  |
|                                                        |              |              |              | 1 | -2.312858000 | 1.822905000  | 0.638495000  |
|                                                        |              |              |              | 6 | -3.543416000 | 3.473921000  | 1.201953000  |
|                                                        |              |              |              | 1 | -3.266197000 | 4.107300000  | 0.353662000  |
|                                                        |              |              |              | 1 | -3.740390000 | 4.127022000  | 2.058906000  |
|                                                        |              |              |              | 1 | -4.478655000 | 2.963097000  | 0.950523000  |
|                                                        |              |              |              | 6 | -2.896756000 | 1.543809000  | 2.682554000  |
|                                                        |              |              |              | 1 | -2.130983000 | 0.799027000  | 2.917381000  |
|                                                        |              |              |              | 1 | -3.825788000 | 1.023719000  | 2.424273000  |
|                                                        |              |              |              | 1 | -3.083664000 | 2.133097000  | 3.587353000  |
|                                                        |              |              |              | 6 | 2.548549000  | 3.252366000  | 0.665915000  |
|                                                        |              |              |              | 1 | 2.316943000  | 2.655911000  | -0.220680000 |
| BS <sup>-1</sup> ( <sup>Ph</sup> I <sub>2</sub> P)AIH: |              |              |              |   |              |              |              |
| 13                                                     | 0.000000000  | 0.000000000  | 0.357136000  |   |              |              |              |
| 7                                                      | 0.000000000  | 1.936772000  | 0.024841000  |   |              |              |              |
| 7                                                      | 0.000000000  | 0.000000000  | -1.497675000 |   |              |              |              |
| 7                                                      | 0.000000000  | -1.936772000 | 0.024841000  |   |              |              |              |
| 6                                                      | 0.095349000  | 2.311169000  | -1.269061000 |   |              |              |              |
| 6                                                      | 0.060133000  | 1.205140000  | -2.166996000 |   |              |              |              |
| 6                                                      | 0.028721000  | 1.213066000  | -3.559517000 |   |              |              |              |
| 1                                                      | 0.023086000  | 2.156255000  | -4.094246000 |   |              |              |              |
| 6                                                      | 0.000000000  | 0.000000000  | -4.253244000 |   |              |              |              |
| 1                                                      | 0.000000000  | 0.000000000  | -5.337428000 |   |              |              |              |
| 6                                                      | -0.028721000 | -1.213066000 | -3.559517000 |   |              |              |              |
| 1                                                      | -0.023086000 | -2.156255000 | -4.094246000 |   |              |              |              |
| 6                                                      | -0.060133000 | -1.205140000 | -2.166996000 |   |              |              |              |
| 6                                                      | -0.095349000 | -2.311169000 | -1.269061000 |   |              |              |              |
| 6                                                      | 0.290928000  | 3.698969000  | -1.734839000 |   |              |              |              |
| 6                                                      | -0.458932000 | 4.767621000  | -1.222573000 |   |              |              |              |
| 1                                                      | -1.218749000 | 4.576599000  | -0.472615000 |   |              |              |              |



|   |              |              |              |                                                            |              |              |              |
|---|--------------|--------------|--------------|------------------------------------------------------------|--------------|--------------|--------------|
| 6 | 3.219143000  | 4.545868000  | 0.190292000  | $^{13}\text{C}$ (PbI <sub>2</sub> P)AlNH <sub>2</sub> -SP: |              |              |              |
| 1 | 2.516888000  | 5.170904000  | -0.370612000 | 13                                                         | -0.000164000 | 0.249243000  | 0.269205000  |
| 1 | 4.070786000  | 4.315259000  | -0.458566000 | 7                                                          | 1.919618000  | 0.054035000  | -0.078004000 |
| 1 | 3.598022000  | 5.131449000  | 1.035221000  | 7                                                          | 0.000115000  | -1.476101000 | -0.376232000 |
| 6 | 3.496684000  | 2.421707000  | 1.540205000  | 7                                                          | -1.918833000 | 0.055115000  | -0.077104000 |
| 1 | 3.021753000  | 1.483831000  | 1.848180000  | 6                                                          | 2.306096000  | -1.172973000 | -0.497318000 |
| 1 | 3.770517000  | 2.971311000  | 2.447770000  | 6                                                          | 1.209035000  | -2.041555000 | -0.748765000 |
| 1 | 4.416921000  | 2.183542000  | 0.995826000  | 6                                                          | 1.212736000  | -3.257635000 | -1.421407000 |
| 6 | -0.046350000 | -2.885936000 | 1.091288000  | 1                                                          | 2.153591000  | -3.689145000 | -1.746328000 |
| 6 | -1.256164000 | -3.528357000 | 1.415407000  | 6                                                          | -0.000147000 | -3.881853000 | -1.737092000 |
| 6 | -1.271231000 | -4.414951000 | 2.492786000  | 1                                                          | -0.000111000 | -4.816444000 | -2.285483000 |
| 1 | -2.201023000 | -4.912472000 | 2.756076000  | 6                                                          | -1.212453000 | -3.256897000 | -1.423098000 |
| 6 | -0.126381000 | -4.664722000 | 3.238217000  | 1                                                          | -2.153172000 | -3.687821000 | -1.749207000 |
| 1 | -0.158059000 | -5.357623000 | 4.073445000  | 6                                                          | -1.209250000 | -2.040518000 | -0.749960000 |
| 6 | 1.056967000  | -4.016659000 | 2.911602000  | 6                                                          | -2.305474000 | -1.171880000 | -0.498771000 |
| 1 | 1.952135000  | -4.207097000 | 3.498442000  | 7                                                          | 0.001572000  | 1.692377000  | 1.328980000  |
| 6 | 1.121867000  | -3.120310000 | 1.842983000  | 1                                                          | 0.835648000  | 2.167569000  | 1.650604000  |
| 6 | -2.548549000 | -3.252366000 | 0.665915000  | 6                                                          | -3.706299000 | -1.626174000 | -0.610184000 |
| 1 | -2.316943000 | -2.655911000 | -0.220680000 | 6                                                          | -4.052406000 | -2.897274000 | -0.120584000 |
| 6 | -3.496684000 | -2.421707000 | 1.540205000  | 6                                                          | -4.725368000 | -0.821829000 | -1.144826000 |
| 1 | -3.021753000 | -1.483831000 | 1.848180000  | 6                                                          | -5.361437000 | -3.361371000 | -0.193111000 |
| 1 | -3.770517000 | -2.971311000 | 2.447770000  | 1                                                          | -3.288104000 | -3.506327000 | 0.352197000  |
| 1 | -4.416921000 | -2.183542000 | 0.995826000  | 6                                                          | -6.033653000 | -1.286385000 | -1.208698000 |
| 6 | -3.219143000 | -4.545868000 | 0.190292000  | 1                                                          | -4.493842000 | 0.171894000  | -1.511495000 |
| 1 | -2.516888000 | -5.170904000 | -0.370612000 | 6                                                          | -6.358766000 | -2.557634000 | -0.738228000 |
| 1 | -4.070786000 | -4.315259000 | -0.458566000 | 1                                                          | -5.604128000 | -4.345110000 | 0.196889000  |
| 1 | -3.598022000 | -5.131449000 | 1.035221000  | 1                                                          | -6.805017000 | -0.648516000 | -1.628923000 |
| 6 | 2.449805000  | -2.448230000 | 1.527385000  | 1                                                          | -7.383320000 | -2.912952000 | -0.786599000 |
| 1 | 2.312858000  | -1.822905000 | 0.638495000  | 6                                                          | 3.706783000  | -1.628637000 | -0.605521000 |
| 6 | 3.543416000  | -3.473921000 | 1.201953000  | 6                                                          | 4.050464000  | -2.899311000 | -0.113074000 |
| 1 | 4.478655000  | -2.963097000 | 0.950523000  | 6                                                          | 4.727875000  | -0.826026000 | -1.138926000 |
| 1 | 3.266197000  | -4.107300000 | 0.353662000  | 6                                                          | 5.359268000  | -3.364638000 | -0.181543000 |
| 1 | 3.740390000  | -4.127022000 | 2.058906000  | 1                                                          | 3.284415000  | -3.506997000 | 0.358597000  |
| 6 | 2.896756000  | -1.543809000 | 2.682554000  | 6                                                          | 6.035854000  | -1.291979000 | -1.199011000 |
| 1 | 2.130983000  | -0.799027000 | 2.917381000  | 1                                                          | 4.498353000  | 0.167384000  | -1.507622000 |
| 1 | 3.825788000  | -1.023719000 | 2.424273000  | 6                                                          | 6.358633000  | -2.562736000 | -0.725636000 |
| 1 | 3.083664000  | -2.133097000 | 3.587353000  | 1                                                          | 5.600110000  | -4.347950000 | 0.210658000  |
| 1 | 0.000000000  | 0.000000000  | 1.941539000  | 1                                                          | 6.808810000  | -0.655529000 | -1.618450000 |
|   |              |              |              | 1                                                          | 7.382964000  | -2.919092000 | -0.770957000 |



|   |              |              |              |   |              |              |              |
|---|--------------|--------------|--------------|---|--------------|--------------|--------------|
| 1 | 5.766492000  | 1.091747000  | 2.934825000  | 1 | 5.737079000  | 0.542475000  | -0.837179000 |
| 6 | 5.999440000  | 2.563547000  | 1.378782000  | 1 | 5.725904000  | 0.836968000  | -2.588629000 |
| 1 | 6.969931000  | 2.898865000  | 1.730887000  | 1 | 6.291032000  | -0.713266000 | -1.956151000 |
| 6 | 5.426613000  | 3.142874000  | 0.249945000  | 6 | 3.959936000  | -1.270599000 | -3.219439000 |
| 1 | 5.951037000  | 3.926381000  | -0.287867000 | 1 | 2.952831000  | -1.689472000 | -3.292740000 |
| 6 | 4.186915000  | 2.706093000  | -0.205411000 | 1 | 4.674779000  | -2.099489000 | -3.262859000 |
| 1 | 3.754345000  | 3.131586000  | -1.105397000 | 1 | 4.140251000  | -0.626804000 | -4.087003000 |
| 6 | -3.574727000 | 1.721353000  | -0.578565000 | 6 | -2.620765000 | -0.974669000 | 0.125573000  |
| 6 | -4.544629000 | 0.961074000  | -1.247874000 | 6 | -3.069190000 | -0.804704000 | 1.456601000  |
| 1 | -4.229000000 | 0.081153000  | -1.799874000 | 6 | -3.791515000 | -1.836117000 | 2.061409000  |
| 6 | -5.882320000 | 1.332857000  | -1.224185000 | 1 | -4.126270000 | -1.710961000 | 3.088134000  |
| 1 | -6.616976000 | 0.731353000  | -1.751102000 | 6 | -4.071100000 | -3.021893000 | 1.396308000  |
| 6 | -6.281281000 | 2.477741000  | -0.534401000 | 1 | -4.619219000 | -3.816054000 | 1.893898000  |
| 1 | -7.327227000 | 2.767958000  | -0.516712000 | 6 | -3.652748000 | -3.169707000 | 0.082000000  |
| 6 | -5.331084000 | 3.239147000  | 0.139532000  | 1 | -3.886620000 | -4.085802000 | -0.455060000 |
| 1 | -5.634038000 | 4.120310000  | 0.697257000  | 6 | -2.949775000 | -2.158339000 | -0.574858000 |
| 6 | -3.992222000 | 2.857189000  | 0.129202000  | 6 | -2.773280000 | 0.427319000  | 2.300781000  |
| 1 | -3.266606000 | 3.416892000  | 0.712174000  | 1 | -2.287118000 | 1.179858000  | 1.676361000  |
| 6 | 2.678841000  | -1.117946000 | 0.124138000  | 6 | -1.804879000 | 0.095552000  | 3.442627000  |
| 6 | 2.380062000  | -2.006575000 | 1.176472000  | 1 | -0.843289000 | -0.249090000 | 3.052663000  |
| 6 | 3.218517000  | -3.098724000 | 1.393983000  | 1 | -2.210987000 | -0.691742000 | 4.088631000  |
| 1 | 2.999506000  | -3.785578000 | 2.205854000  | 1 | -1.622929000 | 0.980759000  | 4.061699000  |
| 6 | 4.328035000  | -3.320879000 | 0.588386000  | 6 | -4.065864000 | 1.034203000  | 2.865302000  |
| 1 | 4.975237000  | -4.173069000 | 0.770824000  | 1 | -4.821523000 | 1.159614000  | 2.085302000  |
| 6 | 4.595340000  | -2.451136000 | -0.458195000 | 1 | -3.863309000 | 2.014462000  | 3.310659000  |
| 1 | 5.452908000  | -2.635448000 | -1.099768000 | 1 | -4.487959000 | 0.397344000  | 3.650934000  |
| 6 | 3.784443000  | -1.343354000 | -0.718843000 | 6 | -2.579744000 | -2.369863000 | -2.035209000 |
| 6 | 1.137860000  | -1.817576000 | 2.027570000  | 1 | -2.123328000 | -1.449913000 | -2.412571000 |
| 1 | 0.853214000  | -0.760659000 | 1.968773000  | 6 | -3.819556000 | -2.663611000 | -2.891882000 |
| 6 | 1.350271000  | -2.158445000 | 3.504849000  | 1 | -3.543647000 | -2.715197000 | -3.950165000 |
| 1 | 2.211917000  | -1.625732000 | 3.919434000  | 1 | -4.583953000 | -1.889363000 | -2.775880000 |
| 1 | 1.510243000  | -3.231301000 | 3.652736000  | 1 | -4.275225000 | -3.621819000 | -2.619272000 |
| 1 | 0.462838000  | -1.881938000 | 4.082620000  | 6 | -1.566858000 | -3.511799000 | -2.195466000 |
| 6 | -0.006008000 | -2.658968000 | 1.447144000  | 1 | -0.650856000 | -3.334459000 | -1.621617000 |
| 1 | -0.197737000 | -2.416093000 | 0.392658000  | 1 | -1.290967000 | -3.636434000 | -3.249127000 |
| 1 | -0.944115000 | -2.510650000 | 1.992403000  | 1 | -1.992299000 | -4.460250000 | -1.848352000 |
| 1 | 0.257157000  | -3.722402000 | 1.477237000  | 7 | 0.362826000  | -0.885270000 | -2.685499000 |
| 6 | 4.126893000  | -0.474927000 | -1.917556000 | 1 | 0.236349000  | -1.816863000 | -3.057934000 |
| 1 | 3.429622000  | 0.368037000  | -1.956639000 | 1 | 1.120270000  | -0.423685000 | -3.180023000 |
| 6 | 5.553000000  | 0.083760000  | -1.812666000 |   |              |              |              |

| <sup>1</sup> ( <sup>210</sup> Pb)AINHPh-SP: |              |              |              |   |              |              |              |
|---------------------------------------------|--------------|--------------|--------------|---|--------------|--------------|--------------|
|                                             |              |              |              | 6 | 4.132583000  | 2.755743000  | -0.229809000 |
| 13                                          | 0.031661000  | 0.066102000  | -0.100334000 | 1 | 4.340494000  | 3.624114000  | -0.846038000 |
| 7                                           | 1.965298000  | -0.246975000 | -0.255043000 | 6 | 4.799820000  | 2.607422000  | 0.983410000  |
| 7                                           | 0.010932000  | -1.558305000 | -0.959338000 | 1 | 5.523439000  | 3.352781000  | 1.299250000  |
| 7                                           | -1.885016000 | -0.371627000 | 0.109788000  | 6 | 4.531087000  | 1.511694000  | 1.789115000  |
| 6                                           | 2.326919000  | -1.453326000 | -0.745106000 | 1 | 5.047060000  | 1.402580000  | 2.739740000  |
| 6                                           | 1.215981000  | -2.204228000 | -1.204772000 | 6 | 3.602184000  | 0.541815000  | 1.399705000  |
| 6                                           | 1.204872000  | -3.452740000 | -1.818974000 | 6 | 2.499218000  | 1.971856000  | -2.007168000 |
| 1                                           | 2.143759000  | -3.931941000 | -2.075707000 | 1 | 1.460301000  | 1.653190000  | -1.873823000 |
| 6                                           | -0.010614000 | -4.091868000 | -2.071760000 | 6 | 3.118927000  | 1.064655000  | -3.080341000 |
| 1                                           | -0.022871000 | -5.072724000 | -2.532080000 | 1 | 3.020181000  | 0.003410000  | -2.833768000 |
| 6                                           | -1.209282000 | -3.498215000 | -1.657876000 | 1 | 4.183482000  | 1.294569000  | -3.210093000 |
| 1                                           | -2.144376000 | -4.039678000 | -1.742718000 | 1 | 2.621000000  | 1.231046000  | -4.041362000 |
| 6                                           | -1.193649000 | -2.225190000 | -1.100296000 | 6 | 2.461293000  | 3.414895000  | -2.511466000 |
| 6                                           | -2.270752000 | -1.510133000 | -0.504767000 | 1 | 2.079967000  | 4.100192000  | -1.748872000 |
| 6                                           | 3.697620000  | -2.015496000 | -0.699552000 | 1 | 1.798034000  | 3.479258000  | -3.379188000 |
| 6                                           | 4.842956000  | -1.291640000 | -1.067005000 | 1 | 3.454211000  | 3.754126000  | -2.830228000 |
| 1                                           | 4.750116000  | -0.274078000 | -1.427108000 | 6 | 3.307666000  | -0.627363000 | 2.323452000  |
| 6                                           | 6.105454000  | -1.866172000 | -0.971205000 | 1 | 2.659342000  | -1.331178000 | 1.792646000  |
| 1                                           | 6.975859000  | -1.288377000 | -1.266015000 | 6 | 4.581772000  | -1.380130000 | 2.721296000  |
| 6                                           | 6.258729000  | -3.168690000 | -0.500081000 | 1 | 5.151527000  | -1.685421000 | 1.838044000  |
| 1                                           | 7.247619000  | -3.609977000 | -0.424315000 | 1 | 4.328432000  | -2.277364000 | 3.295929000  |
| 6                                           | 5.134916000  | -3.892596000 | -0.113231000 | 1 | 5.230428000  | -0.758259000 | 3.348198000  |
| 1                                           | 5.240583000  | -4.899894000 | 0.277718000  | 6 | 2.543857000  | -0.140829000 | 3.560848000  |
| 6                                           | 3.870585000  | -3.319376000 | -0.204177000 | 1 | 1.627718000  | 0.388330000  | 3.273389000  |
| 1                                           | 3.003460000  | -3.871071000 | 0.144932000  | 1 | 3.154542000  | 0.551142000  | 4.151652000  |
| 6                                           | -3.638694000 | -2.070792000 | -0.521763000 | 1 | 2.266300000  | -0.983558000 | 4.204227000  |
| 6                                           | -4.413129000 | -2.189215000 | 0.641764000  | 6 | -2.813695000 | 0.394266000  | 0.890152000  |
| 1                                           | -4.028011000 | -1.821389000 | 1.587012000  | 6 | -3.919235000 | 1.047949000  | 0.312279000  |
| 6                                           | -5.672313000 | -2.776513000 | 0.591862000  | 6 | -4.796905000 | 1.738971000  | 1.154891000  |
| 1                                           | -6.256424000 | -2.863999000 | 1.502670000  | 1 | -5.654904000 | 2.242328000  | 0.717631000  |
| 6                                           | -6.185441000 | -3.250413000 | -0.614786000 | 6 | -4.598278000 | 1.795434000  | 2.522281000  |
| 1                                           | -7.170619000 | -3.704934000 | -0.647675000 | 1 | -5.294203000 | 2.334967000  | 3.157183000  |
| 6                                           | -5.432251000 | -3.124073000 | -1.778807000 | 6 | -3.490649000 | 1.164297000  | 3.078072000  |
| 1                                           | -5.830300000 | -3.469850000 | -2.727800000 | 1 | -3.335885000 | 1.226289000  | 4.149117000  |
| 6                                           | -4.173588000 | -2.533595000 | -1.733614000 | 6 | -2.582126000 | 0.463935000  | 2.287242000  |
| 1                                           | -3.601940000 | -2.401130000 | -2.647570000 | 6 | -4.231984000 | 1.060169000  | -1.176685000 |
| 6                                           | 2.945485000  | 0.701530000  | 0.169764000  | 1 | -3.469436000 | 0.471627000  | -1.699047000 |
| 6                                           | 3.196579000  | 1.816747000  | -0.661709000 | 6 | -4.199829000 | 2.491928000  | -1.731800000 |
|                                             |              |              |              | 1 | -3.278003000 | 3.010625000  | -1.468010000 |

|                                                 |              |              |              |   |              |              |              |
|-------------------------------------------------|--------------|--------------|--------------|---|--------------|--------------|--------------|
| 1                                               | -5.037598000 | 3.075125000  | -1.333747000 | 6 | -0.637847000 | 3.149432000  | -0.100117000 |
| 1                                               | -4.298801000 | 2.477082000  | -2.823183000 | 6 | -1.028406000 | -0.994434000 | -2.147700000 |
| 6                                               | -5.613806000 | 0.453409000  | -1.470568000 | 6 | -0.603965000 | 4.441937000  | 0.451114000  |
| 1                                               | -5.765778000 | -0.507055000 | -0.976129000 | 6 | -1.053937000 | -1.862357000 | -3.219586000 |
| 1                                               | -5.743629000 | 0.313495000  | -2.549241000 | 1 | -1.990308000 | -2.301747000 | -3.548579000 |
| 1                                               | -6.403082000 | 1.133718000  | -1.131155000 | 6 | -3.467370000 | -1.202900000 | -1.482261000 |
| 6                                               | -1.396708000 | -0.241791000 | 2.939385000  | 6 | 3.711283000  | 1.500911000  | 0.383173000  |
| 1                                               | -0.505131000 | -0.012771000 | 2.339391000  | 6 | -1.324409000 | 5.482968000  | -0.120118000 |
| 6                                               | -1.562073000 | -1.767843000 | 2.962158000  | 1 | -1.280864000 | 6.468506000  | 0.334938000  |
| 1                                               | -0.683417000 | -2.234449000 | 3.421396000  | 6 | 0.178689000  | -2.307397000 | -3.758794000 |
| 1                                               | -1.682471000 | -2.190347000 | 1.960597000  | 1 | 0.178004000  | -3.021841000 | -4.573871000 |
| 1                                               | -2.439429000 | -2.041239000 | 3.560232000  | 6 | -2.427133000 | -0.644926000 | 1.217227000  |
| 6                                               | -1.092914000 | 0.257162000  | 4.353384000  | 6 | 3.737513000  | -1.393385000 | -1.206233000 |
| 1                                               | -0.974471000 | 1.344767000  | 4.380937000  | 6 | -3.463417000 | 0.243262000  | 1.537242000  |
| 1                                               | -0.166889000 | -0.199575000 | 4.714106000  | 6 | -1.035746000 | -2.753274000 | 1.644136000  |
| 1                                               | -1.885948000 | -0.022108000 | 5.055394000  | 1 | -0.200592000 | -2.168691000 | 1.236744000  |
| 6                                               | -0.143914000 | 2.980782000  | -0.163786000 | 6 | 2.876677000  | 0.485253000  | 0.901356000  |
| 6                                               | 0.262680000  | 4.227800000  | 0.349653000  | 6 | 4.396527000  | -1.319984000 | -2.442375000 |
| 6                                               | -0.781803000 | 2.978298000  | -1.417813000 | 1 | 3.897174000  | -0.839939000 | -3.279544000 |
| 6                                               | 0.039927000  | 5.403130000  | -0.355689000 | 6 | -1.394380000 | 2.958941000  | -1.271525000 |
| 6                                               | -0.993898000 | 4.158448000  | -2.120846000 | 6 | 1.364977000  | -1.105162000 | -2.023634000 |
| 6                                               | -0.586792000 | 5.384831000  | -1.600838000 | 6 | 2.359769000  | -0.900307000 | -1.055155000 |
| 1                                               | 0.367942000  | 6.346064000  | 0.073310000  | 6 | -2.124319000 | 4.002066000  | -1.827384000 |
| 1                                               | -1.488423000 | 4.113852000  | -3.087927000 | 1 | -2.707230000 | 3.818816000  | -2.725856000 |
| 1                                               | -0.753475000 | 6.303632000  | -2.152517000 | 6 | 4.558575000  | 2.178791000  | 1.261892000  |
| 1                                               | -1.112260000 | 2.029118000  | -1.843971000 | 1 | 5.200819000  | 2.963704000  | 0.871162000  |
| 1                                               | 0.767425000  | 4.259917000  | 1.311589000  | 6 | -2.103360000 | 5.273696000  | -1.256620000 |
| 7                                               | 0.105530000  | 1.802595000  | 0.513892000  | 1 | -2.670019000 | 6.087085000  | -1.697038000 |
| 1                                               | 0.735040000  | 1.966214000  | 1.295700000  | 6 | 2.884844000  | 0.194185000  | 2.282053000  |
|                                                 |              |              |              | 6 | 3.685757000  | 1.945344000  | -1.071632000 |
|                                                 |              |              |              | 1 | 3.056859000  | 1.258981000  | -1.644926000 |
|                                                 |              |              |              | 6 | -5.307191000 | -0.858758000 | -3.033368000 |
|                                                 |              |              |              | 1 | -5.691996000 | -0.401242000 | -3.939319000 |
|                                                 |              |              |              | 6 | -3.983880000 | -1.133582000 | 3.466102000  |
|                                                 |              |              |              | 1 | -4.594274000 | -1.326730000 | 4.343044000  |
|                                                 |              |              |              | 6 | -2.942603000 | -1.998990000 | 3.140033000  |
|                                                 |              |              |              | 1 | -2.751396000 | -2.860865000 | 3.771537000  |
|                                                 |              |              |              | 6 | 1.943733000  | -0.841665000 | 2.874014000  |
|                                                 |              |              |              | 1 | 1.673863000  | -1.539674000 | 2.072690000  |
|                                                 |              |              |              | 6 | -2.059071000 | -0.891321000 | -1.150541000 |
| $^{1}(\text{PbI}_2\text{P})\text{AlNHPh-TET}$ : |              |              |              |   |              |              |              |
| 13                                              | 0.145779000  | 0.372775000  | -0.102787000 |   |              |              |              |
| 7                                               | 1.947571000  | -0.189381000 | 0.052349000  |   |              |              |              |
| 7                                               | 0.169300000  | -0.419889000 | -1.760286000 |   |              |              |              |
| 7                                               | -1.623516000 | -0.456308000 | 0.044196000  |   |              |              |              |
| 7                                               | 0.050558000  | 2.094626000  | 0.484160000  |   |              |              |              |
| 1                                               | 0.693807000  | 2.402897000  | 1.207981000  |   |              |              |              |
| 6                                               | 4.423998000  | -1.942739000 | -0.112537000 |   |              |              |              |
| 1                                               | 3.927804000  | -1.998491000 | 0.852102000  |   |              |              |              |



|   |              |              |              |   |              |              |              |
|---|--------------|--------------|--------------|---|--------------|--------------|--------------|
| 1 | 6.770532000  | -2.232608000 | -1.307820000 | 1 | 4.703854000  | -2.591677000 | 1.923674000  |
| 6 | 5.897343000  | -4.009837000 | -0.460890000 | 1 | 3.614424000  | -3.164392000 | 3.203311000  |
| 1 | 6.841672000  | -4.540077000 | -0.386488000 | 1 | 4.691735000  | -1.799515000 | 3.508269000  |
| 6 | 4.719044000  | -4.606640000 | -0.024225000 | 6 | 2.240790000  | -0.690945000 | 3.468699000  |
| 1 | 4.737091000  | -5.602198000 | 0.408746000  | 1 | 1.482872000  | 0.025597000  | 3.135702000  |
| 6 | 3.514413000  | -3.915464000 | -0.106969000 | 1 | 2.944736000  | -0.146989000 | 4.108841000  |
| 1 | 2.613620000  | -4.362684000 | 0.300901000  | 1 | 1.754279000  | -1.462892000 | 4.076409000  |
| 6 | -3.820722000 | -2.252484000 | -0.208948000 | 6 | -2.856562000 | 0.274155000  | 0.900772000  |
| 6 | -4.558580000 | -2.222215000 | 0.983325000  | 6 | -3.988635000 | 0.915075000  | 0.370131000  |
| 1 | -4.122825000 | -1.796679000 | 1.880743000  | 6 | -4.836191000 | 1.614559000  | 1.235949000  |
| 6 | -5.850450000 | -2.734559000 | 1.024694000  | 1 | -5.717862000 | 2.101230000  | 0.828531000  |
| 1 | -6.405213000 | -2.704987000 | 1.957213000  | 6 | -4.576963000 | 1.697564000  | 2.590417000  |
| 6 | -6.433156000 | -3.281350000 | -0.117497000 | 1 | -5.247046000 | 2.241770000  | 3.248599000  |
| 1 | -7.443333000 | -3.676743000 | -0.078931000 | 6 | -3.438431000 | 1.085979000  | 3.101700000  |
| 6 | -5.715977000 | -3.304999000 | -1.310155000 | 1 | -3.236660000 | 1.170928000  | 4.162464000  |
| 1 | -6.165722000 | -3.709976000 | -2.211355000 | 6 | -2.563644000 | 0.370019000  | 2.284758000  |
| 6 | -4.424627000 | -2.789480000 | -1.356888000 | 6 | -4.348877000 | 0.925096000  | -1.103985000 |
| 1 | -3.879221000 | -2.776495000 | -2.295655000 | 1 | -3.623577000 | 0.309704000  | -1.649783000 |
| 6 | 2.968181000  | 0.140032000  | 0.139434000  | 6 | -4.271110000 | 2.365534000  | -1.627246000 |
| 6 | 3.493642000  | 1.238376000  | -0.580590000 | 1 | -3.291489000 | 2.811266000  | -1.429212000 |
| 6 | 4.567729000  | 1.947003000  | -0.042941000 | 1 | -5.024005000 | 2.987898000  | -1.131817000 |
| 1 | 4.974649000  | 2.789505000  | -0.591394000 | 1 | -4.468341000 | 2.398624000  | -2.703138000 |
| 6 | 5.121018000  | 1.605777000  | 1.184814000  | 6 | -5.754848000 | 0.362889000  | -1.360259000 |
| 1 | 5.955642000  | 2.171852000  | 1.587135000  | 1 | -5.911417000 | -0.597650000 | -0.865106000 |
| 6 | 4.585242000  | 0.544651000  | 1.894782000  | 1 | -5.918519000 | 0.230767000  | -2.435105000 |
| 1 | 5.001902000  | 0.283541000  | 2.863937000  | 1 | -6.519104000 | 1.058479000  | -0.996054000 |
| 6 | 3.514717000  | -0.201912000 | 1.393163000  | 6 | -1.362427000 | -0.329182000 | 2.913578000  |
| 6 | 2.933490000  | 1.631275000  | -1.934618000 | 1 | -0.493229000 | -0.154583000 | 2.263391000  |
| 1 | 1.851815000  | 1.548904000  | -1.849361000 | 6 | -1.550249000 | -1.850248000 | 3.016178000  |
| 6 | 3.406023000  | 0.680592000  | -3.041833000 | 1 | -0.657774000 | -2.307406000 | 3.457739000  |
| 1 | 3.060971000  | -0.345636000 | -2.877231000 | 1 | -1.721695000 | -2.321759000 | 2.044619000  |
| 1 | 4.501551000  | 0.674452000  | -3.096900000 | 1 | -2.402465000 | -2.079903000 | 3.666771000  |
| 1 | 3.028032000  | 1.009633000  | -4.015801000 | 6 | -1.009016000 | 0.223839000  | 4.297136000  |
| 6 | 3.222108000  | 3.079950000  | -2.324743000 | 1 | -0.865631000 | 1.309269000  | 4.278808000  |
| 1 | 2.925334000  | 3.771546000  | -1.529279000 | 1 | -0.090472000 | -0.238456000 | 4.663023000  |
| 1 | 2.644190000  | 3.336669000  | -3.218041000 | 1 | -1.793285000 | -0.007245000 | 5.025314000  |
| 1 | 4.281294000  | 3.237758000  | -2.560014000 | 7 | 0.004988000  | 1.553581000  | 0.241984000  |
| 6 | 2.964116000  | -1.312490000 | 2.270082000  | 1 | 0.296892000  | 1.636853000  | 1.208766000  |
| 1 | 2.228245000  | -1.888256000 | 1.699833000  | 6 | 0.077794000  | 2.781012000  | -0.406888000 |
| 6 | 4.060696000  | -2.273532000 | 2.748422000  | 6 | 0.479981000  | 3.934869000  | 0.325332000  |

|                                                             |              |              |              |   |              |              |              |
|-------------------------------------------------------------|--------------|--------------|--------------|---|--------------|--------------|--------------|
| 6                                                           | -0.260237000 | 2.926146000  | -1.783667000 | 6 | -1.284248000 | -3.192895000 | -2.370698000 |
| 6                                                           | 0.651968000  | 5.145577000  | -0.339052000 | 1 | -2.220427000 | -3.720660000 | -2.512061000 |
| 6                                                           | -0.051006000 | 4.162893000  | -2.398018000 | 6 | -1.210798000 | -2.098317000 | -1.547509000 |
| 6                                                           | 0.422777000  | 5.267356000  | -1.704493000 | 6 | -2.240481000 | -1.644910000 | -0.620160000 |
| 1                                                           | 0.966723000  | 6.018763000  | 0.224405000  | 6 | 3.614913000  | -2.153066000 | -0.989291000 |
| 1                                                           | -0.282017000 | 4.269100000  | -3.453863000 | 6 | 4.828992000  | -1.451057000 | -1.078267000 |
| 1                                                           | 0.576696000  | 6.214305000  | -2.211190000 | 1 | 4.828121000  | -0.372587000 | -1.176479000 |
| 6                                                           | 0.707656000  | 3.838991000  | 1.828423000  | 6 | 6.046386000  | -2.122124000 | -1.036797000 |
| 1                                                           | -0.070691000 | 3.173454000  | 2.234461000  | 1 | 6.968080000  | -1.552698000 | -1.108387000 |
| 6                                                           | 0.539922000  | 5.172959000  | 2.559775000  | 6 | 6.091243000  | -3.508566000 | -0.906552000 |
| 1                                                           | 1.358912000  | 5.862079000  | 2.327683000  | 1 | 7.045160000  | -4.025788000 | -0.873666000 |
| 1                                                           | -0.403637000 | 5.660259000  | 2.297021000  | 6 | 4.899855000  | -4.220374000 | -0.803601000 |
| 1                                                           | 0.554384000  | 5.006417000  | 3.641488000  | 1 | 4.915731000  | -5.298875000 | -0.677648000 |
| 6                                                           | 2.085346000  | 3.242688000  | 2.158036000  | 6 | 3.681586000  | -3.549502000 | -0.831151000 |
| 1                                                           | 2.872143000  | 3.917475000  | 1.802278000  | 1 | 2.760329000  | -4.106581000 | -0.691874000 |
| 1                                                           | 2.208213000  | 3.113443000  | 3.239996000  | 6 | -3.650744000 | -2.049091000 | -0.814613000 |
| 1                                                           | 2.253929000  | 2.275808000  | 1.674074000  | 6 | -4.496642000 | -2.455004000 | 0.228526000  |
| 6                                                           | -0.919837000 | 1.806558000  | -2.593458000 | 1 | -4.125048000 | -2.509569000 | 1.244933000  |
| 1                                                           | -1.574163000 | 1.253522000  | -1.899368000 | 6 | -5.819759000 | -2.790181000 | -0.033551000 |
| 6                                                           | -1.819821000 | 2.350446000  | -3.717836000 | 1 | -6.460005000 | -3.106577000 | 0.783685000  |
| 1                                                           | -1.216389000 | 2.641926000  | -4.584650000 | 6 | -6.326738000 | -2.716254000 | -1.329802000 |
| 1                                                           | -2.510177000 | 1.568648000  | -4.051887000 | 1 | -7.363872000 | -2.970346000 | -1.524726000 |
| 1                                                           | -2.400534000 | 3.218977000  | -3.405672000 | 6 | -5.498616000 | -2.306610000 | -2.370900000 |
| 6                                                           | 0.027984000  | 0.805632000  | -3.286282000 | 1 | -5.886130000 | -2.232236000 | -3.381965000 |
| 1                                                           | 0.660227000  | 0.201524000  | -2.629088000 | 6 | -4.171981000 | -1.975997000 | -2.116582000 |
| 1                                                           | -0.559105000 | 0.102981000  | -3.887727000 | 1 | -3.533150000 | -1.631643000 | -2.923608000 |
| 1                                                           | 0.701957000  | 1.352579000  | -3.955437000 | 6 | 2.956490000  | 0.330449000  | 0.463627000  |
|                                                             |              |              |              | 6 | 3.404835000  | 1.552129000  | -0.091288000 |
|                                                             |              |              |              | 6 | 4.413255000  | 2.253546000  | 0.569879000  |
|                                                             |              |              |              | 1 | 4.765390000  | 3.193799000  | 0.157333000  |
|                                                             |              |              |              | 6 | 4.964620000  | 1.780789000  | 1.756221000  |
|                                                             |              |              |              | 1 | 5.744750000  | 2.345383000  | 2.258073000  |
|                                                             |              |              |              | 6 | 4.508182000  | 0.588121000  | 2.295343000  |
|                                                             |              |              |              | 1 | 4.936046000  | 0.220018000  | 3.224511000  |
|                                                             |              |              |              | 6 | 3.509956000  | -0.156225000 | 1.660334000  |
|                                                             |              |              |              | 6 | 2.827738000  | 2.086036000  | -1.391725000 |
|                                                             |              |              |              | 1 | 1.764583000  | 1.839183000  | -1.391148000 |
|                                                             |              |              |              | 6 | 3.461991000  | 1.411702000  | -2.616290000 |
|                                                             |              |              |              | 1 | 3.271432000  | 0.333810000  | -2.638090000 |
|                                                             |              |              |              | 1 | 4.547092000  | 1.572858000  | -2.622507000 |
| <sup>1</sup> ( <sup>Ph</sup> I <sub>2</sub> P)AlNHDipp-TET: |              |              |              |   |              |              |              |
| 13                                                          | 0.068784000  | -0.104225000 | -0.110441000 |   |              |              |              |
| 7                                                           | 1.933887000  | -0.407764000 | -0.212113000 |   |              |              |              |
| 7                                                           | -0.019694000 | -1.453745000 | -1.344148000 |   |              |              |              |
| 7                                                           | -1.783778000 | -0.848409000 | 0.331080000  |   |              |              |              |
| 6                                                           | 2.279341000  | -1.511464000 | -0.992338000 |   |              |              |              |
| 6                                                           | 1.194809000  | -2.070359000 | -1.660087000 |   |              |              |              |
| 6                                                           | 1.137222000  | -3.154820000 | -2.574607000 |   |              |              |              |
| 1                                                           | 2.062405000  | -3.584076000 | -2.946424000 |   |              |              |              |
| 6                                                           | -0.076038000 | -3.671774000 | -2.963158000 |   |              |              |              |
| 1                                                           | -0.114912000 | -4.503771000 | -3.657057000 |   |              |              |              |





|   |              |              |              |   |              |              |              |
|---|--------------|--------------|--------------|---|--------------|--------------|--------------|
| 7 | -0.265008000 | -1.774570000 | 0.141352000  | 1 | -1.840259000 | 4.705921000  | -2.696393000 |
| 6 | 0.323157000  | 2.261775000  | 1.367199000  | 6 | -0.918112000 | 3.381696000  | -1.283714000 |
| 6 | 0.185610000  | 1.188690000  | 2.288356000  | 6 | 2.398138000  | 1.465937000  | -1.824255000 |
| 6 | 0.226855000  | 1.181420000  | 3.672830000  | 1 | 2.310105000  | 0.991459000  | -0.842155000 |
| 1 | 0.431926000  | 2.110336000  | 4.194262000  | 6 | 3.700212000  | 2.277937000  | -1.840640000 |
| 6 | 0.000000000  | 0.000000000  | 4.381376000  | 1 | 3.693315000  | 3.064695000  | -1.079289000 |
| 1 | 0.000000000  | 0.000000000  | 5.464520000  | 1 | 3.856345000  | 2.756122000  | -2.813912000 |
| 6 | -0.226855000 | -1.181420000 | 3.672830000  | 1 | 4.558297000  | 1.625813000  | -1.647116000 |
| 1 | -0.431926000 | -2.110336000 | 4.194262000  | 6 | 2.444020000  | 0.355458000  | -2.881626000 |
| 6 | -0.185610000 | -1.188690000 | 2.288356000  | 1 | 1.562053000  | -0.289743000 | -2.812715000 |
| 6 | -0.323157000 | -2.261775000 | 1.367199000  | 1 | 3.337421000  | -0.263702000 | -2.747004000 |
| 6 | 0.461333000  | 3.683282000  | 1.743810000  | 1 | 2.483980000  | 0.775460000  | -3.892859000 |
| 6 | 1.353363000  | 4.517371000  | 1.058853000  | 6 | -2.070292000 | 3.532511000  | -0.302300000 |
| 1 | 1.958298000  | 4.105129000  | 0.257032000  | 1 | -1.819238000 | 3.012400000  | 0.624205000  |
| 6 | 1.460396000  | 5.861436000  | 1.397218000  | 6 | -2.326633000 | 5.003357000  | 0.046556000  |
| 1 | 2.157406000  | 6.496333000  | 0.859386000  | 1 | -1.408670000 | 5.496465000  | 0.382443000  |
| 6 | 0.676616000  | 6.393290000  | 2.420202000  | 1 | -3.071289000 | 5.079837000  | 0.846150000  |
| 1 | 0.759492000  | 7.444184000  | 2.679265000  | 1 | -2.712500000 | 5.554189000  | -0.818373000 |
| 6 | -0.221002000 | 5.574211000  | 3.099971000  | 6 | -3.333475000 | 2.861010000  | -0.854214000 |
| 1 | -0.848601000 | 5.985448000  | 3.884499000  | 1 | -3.158141000 | 1.792865000  | -1.015643000 |
| 6 | -0.332433000 | 4.229399000  | 2.761257000  | 1 | -3.631538000 | 3.304537000  | -1.810778000 |
| 1 | -1.066641000 | 3.602463000  | 3.258811000  | 1 | -4.166548000 | 2.973632000  | -0.152005000 |
| 6 | -0.461333000 | -3.683282000 | 1.743810000  | 6 | -0.193410000 | -2.545019000 | -1.045443000 |
| 6 | -1.353363000 | -4.517371000 | 1.058853000  | 6 | 0.918112000  | -3.381696000 | -1.283714000 |
| 1 | -1.958298000 | -4.105129000 | 0.257032000  | 6 | 0.987470000  | -4.061129000 | -2.499930000 |
| 6 | -1.460396000 | -5.861436000 | 1.397218000  | 1 | 1.840259000  | -4.705921000 | -2.696393000 |
| 1 | -2.157406000 | -6.496333000 | 0.859386000  | 6 | 0.000000000  | -3.919942000 | -3.466565000 |
| 6 | -0.676616000 | -6.393290000 | 2.420202000  | 1 | 0.073311000  | -4.458701000 | -4.406305000 |
| 1 | -0.759492000 | -7.444184000 | 2.679265000  | 6 | -1.073957000 | -3.075263000 | -3.225587000 |
| 6 | 0.221002000  | -5.574211000 | 3.099971000  | 1 | -1.842450000 | -2.956279000 | -3.985134000 |
| 1 | 0.848601000  | -5.985448000 | 3.884499000  | 6 | -1.189433000 | -2.367707000 | -2.026667000 |
| 6 | 0.332433000  | -4.229399000 | 2.761257000  | 6 | 2.070292000  | -3.532511000 | -0.302300000 |
| 1 | 1.066641000  | -3.602463000 | 3.258811000  | 1 | 1.819238000  | -3.012400000 | 0.624205000  |
| 6 | 0.193410000  | 2.545019000  | -1.045443000 | 6 | 3.333475000  | -2.861010000 | -0.854214000 |
| 6 | 1.189433000  | 2.367707000  | -2.026667000 | 1 | 3.158141000  | -1.792865000 | -1.015643000 |
| 6 | 1.073957000  | 3.075263000  | -3.225587000 | 1 | 3.631538000  | -3.304537000 | -1.810778000 |
| 1 | 1.842450000  | 2.956279000  | -3.985134000 | 1 | 4.166548000  | -2.973632000 | -0.152005000 |
| 6 | 0.000000000  | 3.919942000  | -3.466565000 | 6 | 2.326633000  | -5.003357000 | 0.046556000  |
| 1 | -0.073311000 | 4.458701000  | -4.406305000 | 1 | 1.408670000  | -5.496465000 | 0.382443000  |
| 6 | -0.987470000 | 4.061129000  | -2.499930000 | 1 | 3.071289000  | -5.079837000 | 0.846150000  |

|                                          |              |              |              |   |              |              |              |
|------------------------------------------|--------------|--------------|--------------|---|--------------|--------------|--------------|
| 1                                        | 2.712500000  | -5.554189000 | -0.818373000 | 6 | 3.536083000  | 1.764838000  | -0.288351000 |
| 6                                        | -2.398138000 | -1.465937000 | -1.824255000 | 6 | 4.745753000  | 1.559001000  | 0.382645000  |
| 1                                        | -2.310105000 | -0.991459000 | -0.842155000 | 1 | 4.766666000  | 0.946815000  | 1.278978000  |
| 6                                        | -3.700212000 | -2.277937000 | -1.840640000 | 6 | 5.918657000  | 2.132874000  | -0.097122000 |
| 1                                        | -4.558297000 | -1.625813000 | -1.647116000 | 1 | 6.851583000  | 1.971789000  | 0.433591000  |
| 1                                        | -3.693315000 | -3.064695000 | -1.079289000 | 6 | 5.897681000  | 2.907725000  | -1.255281000 |
| 1                                        | -3.856345000 | -2.756122000 | -2.813912000 | 1 | 6.816124000  | 3.347932000  | -1.631139000 |
| 6                                        | -2.444020000 | -0.355458000 | -2.881626000 | 6 | 4.696492000  | 3.117585000  | -1.928469000 |
| 1                                        | -1.562053000 | 0.289743000  | -2.812715000 | 1 | 4.674649000  | 3.718871000  | -2.831891000 |
| 1                                        | -3.337421000 | 0.263702000  | -2.747004000 | 6 | 3.520070000  | 2.556032000  | -1.442522000 |
| 1                                        | -2.483980000 | -0.775460000 | -3.892859000 | 1 | 2.580763000  | 2.720616000  | -1.962880000 |
| 1                                        | 0.000000000  | 0.000000000  | -1.110328000 | 6 | -2.851317000 | -1.098561000 | -0.601003000 |
| 5                                        | 0.000000000  | 0.000000000  | 0.106534000  | 6 | -3.031316000 | -1.479652000 | -1.942650000 |
|                                          |              |              |              | 6 | -3.825358000 | -2.596970000 | -2.207833000 |
|                                          |              |              |              | 1 | -3.966140000 | -2.918614000 | -3.236149000 |
|                                          |              |              |              | 6 | -4.442720000 | -3.298610000 | -1.179934000 |
|                                          |              |              |              | 1 | -5.058611000 | -4.164001000 | -1.405211000 |
|                                          |              |              |              | 6 | -4.274150000 | -2.887096000 | 0.135719000  |
|                                          |              |              |              | 1 | -4.762243000 | -3.435790000 | 0.936902000  |
|                                          |              |              |              | 6 | -3.478281000 | -1.784424000 | 0.451467000  |
|                                          |              |              |              | 6 | -2.394161000 | -0.714573000 | -3.091680000 |
|                                          |              |              |              | 1 | -2.019196000 | 0.234895000  | -2.695723000 |
|                                          |              |              |              | 6 | -3.403299000 | -0.386836000 | -4.198489000 |
|                                          |              |              |              | 1 | -4.276584000 | 0.142313000  | -3.804291000 |
|                                          |              |              |              | 1 | -3.757388000 | -1.291983000 | -4.702746000 |
|                                          |              |              |              | 1 | -2.933727000 | 0.248040000  | -4.956557000 |
|                                          |              |              |              | 6 | -1.203928000 | -1.492904000 | -3.666388000 |
|                                          |              |              |              | 1 | -0.452436000 | -1.688578000 | -2.896844000 |
|                                          |              |              |              | 1 | -0.730246000 | -0.930737000 | -4.478567000 |
|                                          |              |              |              | 1 | -1.535304000 | -2.457173000 | -4.068590000 |
|                                          |              |              |              | 6 | -3.297136000 | -1.382882000 | 1.905207000  |
|                                          |              |              |              | 1 | -2.720443000 | -0.454087000 | 1.938224000  |
|                                          |              |              |              | 6 | -4.646114000 | -1.118668000 | 2.584798000  |
|                                          |              |              |              | 1 | -5.238627000 | -0.390782000 | 2.021240000  |
|                                          |              |              |              | 1 | -4.489436000 | -0.727314000 | 3.595500000  |
|                                          |              |              |              | 1 | -5.231385000 | -2.040813000 | 2.673974000  |
|                                          |              |              |              | 6 | -2.495173000 | -2.450734000 | 2.659722000  |
|                                          |              |              |              | 1 | -1.522857000 | -2.618226000 | 2.186448000  |
|                                          |              |              |              | 1 | -3.033169000 | -3.405343000 | 2.675192000  |
|                                          |              |              |              | 1 | -2.325305000 | -2.141526000 | 3.696499000  |
| $^{1}(\text{PbI}_2\text{P})\text{BH-T:}$ |              |              |              |   |              |              |              |
| 7                                        | -2.002525000 | 0.015441000  | -0.307579000 |   |              |              |              |
| 7                                        | -0.191750000 | 1.335305000  | 0.077208000  |   |              |              |              |
| 7                                        | 2.156764000  | -0.087976000 | 0.585167000  |   |              |              |              |
| 6                                        | -2.469743000 | 1.265326000  | 0.120347000  |   |              |              |              |
| 6                                        | -1.377994000 | 2.071783000  | 0.326486000  |   |              |              |              |
| 6                                        | -1.291090000 | 3.465771000  | 0.630016000  |   |              |              |              |
| 1                                        | -2.213512000 | 4.020055000  | 0.767015000  |   |              |              |              |
| 6                                        | -0.077685000 | 4.065427000  | 0.702481000  |   |              |              |              |
| 1                                        | 0.006292000  | 5.125498000  | 0.914281000  |   |              |              |              |
| 6                                        | 1.113650000  | 3.286312000  | 0.509594000  |   |              |              |              |
| 1                                        | 2.088320000  | 3.745147000  | 0.624947000  |   |              |              |              |
| 6                                        | 1.044684000  | 1.958562000  | 0.225127000  |   |              |              |              |
| 6                                        | 2.273018000  | 1.118592000  | 0.186981000  |   |              |              |              |
| 6                                        | -3.878678000 | 1.591893000  | 0.367079000  |   |              |              |              |
| 6                                        | -4.900891000 | 1.202690000  | -0.511008000 |   |              |              |              |
| 1                                        | -4.650670000 | 0.660551000  | -1.417338000 |   |              |              |              |
| 6                                        | -6.228767000 | 1.503456000  | -0.229073000 |   |              |              |              |
| 1                                        | -7.006074000 | 1.189062000  | -0.918783000 |   |              |              |              |
| 6                                        | -6.563519000 | 2.209982000  | 0.924749000  |   |              |              |              |
| 1                                        | -7.601453000 | 2.443336000  | 1.140522000  |   |              |              |              |
| 6                                        | -5.557625000 | 2.608204000  | 1.801659000  |   |              |              |              |
| 1                                        | -5.807954000 | 3.146687000  | 2.710690000  |   |              |              |              |
| 6                                        | -4.230515000 | 2.291604000  | 1.531810000  |   |              |              |              |
| 1                                        | -3.452656000 | 2.554851000  | 2.243198000  |   |              |              |              |

|                                            |              |              |              |   |              |              |              |
|--------------------------------------------|--------------|--------------|--------------|---|--------------|--------------|--------------|
| 6                                          | 3.201334000  | -1.033823000 | 0.600977000  | 1 | 0.037931000  | 2.154190000  | -4.065124000 |
| 6                                          | 3.762808000  | -1.545135000 | -0.581969000 | 6 | 0.000000000  | 0.000000000  | -4.234073000 |
| 6                                          | 4.735395000  | -2.544020000 | -0.467226000 | 1 | 0.000000000  | 0.000000000  | -5.317579000 |
| 1                                          | 5.177965000  | -2.952437000 | -1.372548000 | 6 | -0.036724000 | -1.209050000 | -3.533412000 |
| 6                                          | 5.146439000  | -3.019614000 | 0.767833000  | 1 | -0.037931000 | -2.154190000 | -4.065124000 |
| 1                                          | 5.910845000  | -3.787733000 | 0.831518000  | 6 | -0.067032000 | -1.204789000 | -2.143631000 |
| 6                                          | 4.565134000  | -2.513155000 | 1.928718000  | 6 | -0.106184000 | -2.331105000 | -1.269724000 |
| 1                                          | 4.886068000  | -2.892815000 | 2.893500000  | 6 | 0.314912000  | 3.707118000  | -1.771070000 |
| 6                                          | 3.578652000  | -1.534512000 | 1.868213000  | 6 | -0.448349000 | 4.784979000  | -1.301825000 |
| 6                                          | 3.327829000  | -1.094735000 | -1.966404000 | 1 | -1.228031000 | 4.607308000  | -0.569105000 |
| 1                                          | 2.592049000  | -0.292075000 | -1.859651000 | 6 | -0.212342000 | 6.073679000  | -1.765881000 |
| 6                                          | 2.637467000  | -2.242624000 | -2.714002000 | 1 | -0.814766000 | 6.895590000  | -1.392231000 |
| 1                                          | 1.785535000  | -2.624616000 | -2.143099000 | 6 | 0.789463000  | 6.312055000  | -2.705806000 |
| 1                                          | 3.330806000  | -3.074623000 | -2.880126000 | 1 | 0.972750000  | 7.320216000  | -3.063669000 |
| 1                                          | 2.276448000  | -1.903978000 | -3.691337000 | 6 | 1.559506000  | 5.251178000  | -3.174824000 |
| 6                                          | 4.508964000  | -0.547025000 | -2.776678000 | 1 | 2.353765000  | 5.428450000  | -3.893198000 |
| 1                                          | 5.042252000  | 0.234103000  | -2.226320000 | 6 | 1.330018000  | 3.961250000  | -2.705874000 |
| 1                                          | 4.159422000  | -0.125404000 | -3.725258000 | 1 | 1.961271000  | 3.142513000  | -3.038114000 |
| 1                                          | 5.223610000  | -1.343996000 | -3.011138000 | 6 | -0.314912000 | -3.707118000 | -1.771070000 |
| 6                                          | 2.885616000  | -1.002015000 | 3.113137000  | 6 | 0.448349000  | -4.784979000 | -1.301825000 |
| 1                                          | 2.772942000  | 0.083360000  | 2.991142000  | 1 | 1.228031000  | -4.607308000 | -0.569105000 |
| 6                                          | 3.670299000  | -1.244382000 | 4.402303000  | 6 | 0.212342000  | -6.073679000 | -1.765881000 |
| 1                                          | 3.179951000  | -0.733876000 | 5.236601000  | 1 | 0.814766000  | -6.895590000 | -1.392231000 |
| 1                                          | 4.697922000  | -0.873672000 | 4.329236000  | 6 | -0.789463000 | -6.312055000 | -2.705806000 |
| 1                                          | 3.709521000  | -2.310540000 | 4.651347000  | 1 | -0.972750000 | -7.320216000 | -3.063669000 |
| 6                                          | 1.475037000  | -1.601454000 | 3.226683000  | 6 | -1.559506000 | -5.251178000 | -3.174824000 |
| 1                                          | 0.885608000  | -1.376326000 | 2.334140000  | 1 | -2.353765000 | -5.428450000 | -3.893198000 |
| 1                                          | 0.953981000  | -1.195582000 | 4.100760000  | 6 | -1.330018000 | -3.961250000 | -2.705874000 |
| 1                                          | 1.538937000  | -2.689418000 | 3.340850000  | 1 | -1.961271000 | -3.142513000 | -3.038114000 |
| 1                                          | 0.090486000  | -0.917912000 | -0.669403000 | 6 | 0.052059000  | 2.968117000  | 1.073549000  |
| 5                                          | -0.576070000 | 0.001427000  | -0.338057000 | 6 | -1.122464000 | 3.235901000  | 1.805086000  |
|                                            |              |              |              | 6 | -1.049891000 | 4.126185000  | 2.877916000  |
|                                            |              |              |              | 1 | -1.948168000 | 4.338944000  | 3.451829000  |
|                                            |              |              |              | 6 | 0.145834000  | 4.741080000  | 3.224619000  |
|                                            |              |              |              | 1 | 0.183782000  | 5.429417000  | 4.063148000  |
|                                            |              |              |              | 6 | 1.293791000  | 4.466275000  | 2.492834000  |
|                                            |              |              |              | 1 | 2.231471000  | 4.941660000  | 2.768557000  |
|                                            |              |              |              | 6 | 1.272293000  | 3.582305000  | 1.413112000  |
|                                            |              |              |              | 6 | -2.460411000 | 2.600298000  | 1.459125000  |
|                                            |              |              |              | 1 | -2.331749000 | 2.019576000  | 0.539756000  |
| $^{1}(\text{PbI}_2\text{P})\text{GaH-SP:}$ |              |              |              |   |              |              |              |
| 7                                          | 0.000000000  | 2.004672000  | 0.024453000  | 6 | 0.145834000  | 4.741080000  | 3.224619000  |
| 7                                          | 0.000000000  | 0.000000000  | -1.466985000 | 1 | 0.183782000  | 5.429417000  | 4.063148000  |
| 7                                          | 0.000000000  | -2.004672000 | 0.024453000  | 6 | 1.293791000  | 4.466275000  | 2.492834000  |
| 6                                          | 0.106184000  | 2.331105000  | -1.269724000 | 1 | 2.231471000  | 4.941660000  | 2.768557000  |
| 6                                          | 0.067032000  | 1.204789000  | -2.143631000 | 6 | 1.272293000  | 3.582305000  | 1.413112000  |
| 6                                          | 0.036724000  | 1.209050000  | -3.533412000 | 6 | -2.460411000 | 2.600298000  | 1.459125000  |
|                                            |              |              |              | 1 | -2.331749000 | 2.019576000  | 0.539756000  |

|   |              |              |              |    |                                                        |              |              |
|---|--------------|--------------|--------------|----|--------------------------------------------------------|--------------|--------------|
| 6 | -3.543576000 | 3.653819000  | 1.192938000  | 1  | 4.478395000                                            | -3.166835000 | 0.896918000  |
| 1 | -3.253506000 | 4.342997000  | 0.393841000  | 1  | 3.253506000                                            | -4.342997000 | 0.393841000  |
| 1 | -3.748834000 | 4.248289000  | 2.089525000  | 1  | 3.748834000                                            | -4.248289000 | 2.089525000  |
| 1 | -4.478395000 | 3.166835000  | 0.896918000  | 6  | 2.916603000                                            | -1.643860000 | 2.568297000  |
| 6 | -2.916603000 | 1.643860000  | 2.568297000  | 1  | 2.162844000                                            | -0.875382000 | 2.762215000  |
| 1 | -2.162844000 | 0.875382000  | 2.762215000  | 1  | 3.855164000                                            | -1.152046000 | 2.289768000  |
| 1 | -3.855164000 | 1.152046000  | 2.289768000  | 1  | 3.086940000                                            | -2.190252000 | 3.502968000  |
| 1 | -3.086940000 | 2.190252000  | 3.502968000  | 1  | 0.000000000                                            | 0.000000000  | 1.983828000  |
| 6 | 2.565387000  | 3.285310000  | 0.673815000  | 31 | 0.000000000                                            | 0.000000000  | 0.411570000  |
| 1 | 2.333477000  | 2.671513000  | -0.200890000 |    |                                                        |              |              |
| 6 | 3.237335000  | 4.569769000  | 0.175088000  |    | <sup>1</sup> ( <sup>Ph</sup> I <sub>2</sub> P)GaH-TET: |              |              |
| 1 | 2.537500000  | 5.182204000  | -0.402358000 | 7  | 1.858340000                                            | -0.024575000 | -0.071739000 |
| 1 | 4.093432000  | 4.327697000  | -0.463731000 | 7  | 0.133001000                                            | 1.616602000  | -1.110883000 |
| 1 | 3.608993000  | 5.172777000  | 1.010985000  | 7  | -1.837711000                                           | -0.019589000 | -0.583216000 |
| 6 | 3.512852000  | 2.471917000  | 1.564878000  | 6  | 2.221843000                                            | 1.240219000  | -0.029675000 |
| 1 | 3.039157000  | 1.539583000  | 1.890255000  | 6  | 1.222035000                                            | 2.197393000  | -0.502486000 |
| 1 | 3.787284000  | 3.039207000  | 2.461248000  | 6  | 1.239681000                                            | 3.548196000  | -0.260916000 |
| 1 | 4.433133000  | 2.223765000  | 1.025180000  | 1  | 2.073691000                                            | 4.021018000  | 0.243043000  |
| 6 | -0.052059000 | -2.968117000 | 1.073549000  | 6  | 0.075107000                                            | 4.302378000  | -0.620262000 |
| 6 | -1.272293000 | -3.582305000 | 1.413112000  | 1  | 0.101668000                                            | 5.385422000  | -0.572869000 |
| 6 | -1.293791000 | -4.466275000 | 2.492834000  | 6  | -1.101769000                                           | 3.652556000  | -0.884503000 |
| 1 | -2.231471000 | -4.941660000 | 2.768557000  | 1  | -2.019976000                                           | 4.213458000  | -1.029436000 |
| 6 | -0.145834000 | -4.741080000 | 3.224619000  | 6  | -1.120646000                                           | 2.219420000  | -0.881370000 |
| 1 | -0.183782000 | -5.429417000 | 4.063148000  | 6  | -2.161620000                                           | 1.349488000  | -0.614869000 |
| 6 | 1.049891000  | -4.126185000 | 2.877916000  | 6  | 3.540981000                                            | 1.702021000  | 0.452461000  |
| 1 | 1.948168000  | -4.338944000 | 3.451829000  | 6  | 4.114940000                                            | 1.156279000  | 1.608416000  |
| 6 | 1.122464000  | -3.235901000 | 1.805086000  | 1  | 3.581519000                                            | 0.389445000  | 2.161660000  |
| 6 | -2.565387000 | -3.285310000 | 0.673815000  | 6  | 5.355758000                                            | 1.599001000  | 2.049264000  |
| 1 | -2.333477000 | -2.671513000 | -0.200890000 | 1  | 5.788471000                                            | 1.173914000  | 2.949009000  |
| 6 | -3.512852000 | -2.471917000 | 1.564878000  | 6  | 6.043021000                                            | 2.584627000  | 1.340588000  |
| 1 | -3.039157000 | -1.539583000 | 1.890255000  | 1  | 7.014879000                                            | 2.923315000  | 1.685172000  |
| 1 | -3.787284000 | -3.039207000 | 2.461248000  | 6  | 5.482615000                                            | 3.127339000  | 0.187334000  |
| 1 | -4.433133000 | -2.223765000 | 1.025180000  | 1  | 6.017989000                                            | 3.885107000  | -0.375609000 |
| 6 | -3.237335000 | -4.569769000 | 0.175088000  | 6  | 4.239542000                                            | 2.688426000  | -0.257487000 |
| 1 | -2.537500000 | -5.182204000 | -0.402358000 | 1  | 3.812441000                                            | 3.087874000  | -1.171965000 |
| 1 | -4.093432000 | -4.327697000 | -0.463731000 | 6  | -3.560519000                                           | 1.799423000  | -0.473429000 |
| 1 | -3.608993000 | -5.172777000 | 1.010985000  | 6  | -4.602917000                                           | 1.082944000  | -1.080183000 |
| 6 | 2.460411000  | -2.600298000 | 1.459125000  | 1  | -4.365040000                                           | 0.193961000  | -1.656045000 |
| 1 | 2.331749000  | -2.019576000 | 0.539756000  | 6  | -5.921796000                                           | 1.504301000  | -0.959920000 |
| 6 | 3.543576000  | -3.653819000 | 1.192938000  |    |                                                        |              |              |



|   |              |              |              |   |              |              |              |
|---|--------------|--------------|--------------|---|--------------|--------------|--------------|
| 1 | 2.141432000  | 4.165460000  | 0.265721000  | 6 | -1.199699000 | -2.739175000 | -3.058968000 |
| 6 | 1.197007000  | 2.213455000  | 0.091542000  | 1 | -0.554542000 | -2.994856000 | -2.213259000 |
| 6 | 2.300390000  | 1.297473000  | 0.188712000  | 1 | -0.568015000 | -2.489506000 | -3.918493000 |
| 6 | -3.696964000 | 1.768781000  | -0.155388000 | 1 | -1.780069000 | -3.630954000 | -3.320168000 |
| 6 | -4.683605000 | 1.232783000  | -0.996988000 | 6 | -3.550732000 | -0.613938000 | 2.123218000  |
| 1 | -4.415682000 | 0.465238000  | -1.714637000 | 1 | -2.928772000 | 0.268391000  | 1.952493000  |
| 6 | -5.999879000 | 1.673499000  | -0.917355000 | 6 | -4.914707000 | -0.124992000 | 2.622325000  |
| 1 | -6.746312000 | 1.247228000  | -1.580188000 | 1 | -5.442601000 | 0.431980000  | 1.841533000  |
| 6 | -6.362089000 | 2.654708000  | 0.003705000  | 1 | -4.788099000 | 0.532059000  | 3.489301000  |
| 1 | -7.391133000 | 2.994387000  | 0.064138000  | 1 | -5.548234000 | -0.963043000 | 2.933207000  |
| 6 | -5.394621000 | 3.190524000  | 0.851044000  | 6 | -2.844679000 | -1.473521000 | 3.180009000  |
| 1 | -5.667579000 | 3.942919000  | 1.584472000  | 1 | -1.854938000 | -1.789069000 | 2.830734000  |
| 6 | -4.078515000 | 2.749255000  | 0.775756000  | 1 | -3.423852000 | -2.377876000 | 3.397026000  |
| 1 | -3.336430000 | 3.144661000  | 1.463281000  | 1 | -2.721531000 | -0.915677000 | 4.114573000  |
| 6 | 3.696970000  | 1.768793000  | 0.155400000  | 6 | 2.879434000  | -1.076422000 | 0.307815000  |
| 6 | 4.683590000  | 1.232816000  | 0.997039000  | 6 | 3.666972000  | -1.384518000 | -0.819208000 |
| 1 | 4.415644000  | 0.465300000  | 1.714710000  | 6 | 4.544455000  | -2.466509000 | -0.745020000 |
| 6 | 5.999868000  | 1.673520000  | 0.917417000  | 1 | 5.154469000  | -2.714123000 | -1.609759000 |
| 1 | 6.746286000  | 1.247265000  | 1.580277000  | 6 | 4.643824000  | -3.238494000 | 0.405807000  |
| 6 | 6.362102000  | 2.654698000  | -0.003667000 | 1 | 5.332401000  | -4.076801000 | 0.443997000  |
| 1 | 7.391150000  | 2.994367000  | -0.064092000 | 6 | 3.849267000  | -2.935150000 | 1.502982000  |
| 6 | 5.394654000  | 3.190496000  | -0.851040000 | 1 | 3.921493000  | -3.542977000 | 2.401421000  |
| 1 | 5.667632000  | 3.942868000  | -1.584484000 | 6 | 2.957770000  | -1.860630000 | 1.476892000  |
| 6 | 4.078543000  | 2.749238000  | -0.775764000 | 6 | 3.550682000  | -0.613961000 | -2.123210000 |
| 1 | 3.336474000  | 3.144628000  | -1.463315000 | 1 | 2.928738000  | 0.268379000  | -1.952478000 |
| 6 | -2.879420000 | -1.076438000 | -0.307782000 | 6 | 2.844591000  | -1.473545000 | -3.179975000 |
| 6 | -2.957726000 | -1.860667000 | -1.476849000 | 1 | 1.854856000  | -1.789080000 | -2.830670000 |
| 6 | -3.849249000 | -2.935165000 | -1.502955000 | 1 | 3.423749000  | -2.377907000 | -3.397000000 |
| 1 | -3.921462000 | -3.542999000 | -2.401390000 | 1 | 2.721425000  | -0.915707000 | -4.114540000 |
| 6 | -4.643849000 | -3.238478000 | -0.405802000 | 6 | 4.914651000  | -0.125036000 | -2.622353000 |
| 1 | -5.332444000 | -4.076769000 | -0.444005000 | 1 | 5.442567000  | 0.431942000  | -1.841580000 |
| 6 | -4.544497000 | -2.466484000 | 0.745020000  | 1 | 4.788031000  | 0.532004000  | -3.489336000 |
| 1 | -5.154544000 | -2.714074000 | 1.609743000  | 1 | 5.548163000  | -0.963099000 | -2.933236000 |
| 6 | -3.666998000 | -1.384508000 | 0.819222000  | 6 | 2.125461000  | -1.565599000 | 2.715448000  |
| 6 | -2.125384000 | -1.565668000 | -2.715392000 | 1 | 1.502802000  | -0.689264000 | 2.505011000  |
| 1 | -1.502605000 | -0.689430000 | -2.504908000 | 6 | 3.011209000  | -1.215664000 | 3.918302000  |
| 6 | -3.011106000 | -1.215533000 | -3.918207000 | 1 | 2.393134000  | -0.982689000 | 4.791557000  |
| 1 | -3.646204000 | -0.348664000 | -3.711893000 | 1 | 3.646460000  | -0.348894000 | 3.712042000  |
| 1 | -3.662723000 | -2.055129000 | -4.183257000 | 1 | 3.662677000  | -2.055379000 | 4.183341000  |
| 1 | -2.393018000 | -0.982626000 | -4.791471000 | 6 | 1.199619000  | -2.739011000 | 3.058928000  |

|    |             |              |              |   |              |              |              |
|----|-------------|--------------|--------------|---|--------------|--------------|--------------|
| 1  | 0.554427000 | -2.994541000 | 2.213198000  | 1 | -2.352759000 | -5.428368000 | -3.894548000 |
| 1  | 0.567970000 | -2.489336000 | 3.918477000  | 6 | -1.329363000 | -3.961049000 | -2.707152000 |
| 1  | 1.779878000 | -3.630888000 | 3.320043000  | 1 | -1.959305000 | -3.142091000 | -3.041372000 |
| 1  | 0.000038000 | -1.966090000 | -0.000185000 | 6 | 0.052188000  | 2.965896000  | 1.073712000  |
| 31 | 0.000014000 | -0.386247000 | -0.000041000 | 6 | -1.121958000 | 3.232346000  | 1.806366000  |
|    |             |              |              | 6 | -1.049440000 | 4.122380000  | 2.879423000  |
|    |             |              |              | 1 | -1.947498000 | 4.334119000  | 3.454070000  |
|    |             |              |              | 6 | 0.145942000  | 4.738347000  | 3.225363000  |
|    |             |              |              | 1 | 0.183866000  | 5.426536000  | 4.064014000  |
|    |             |              |              | 6 | 1.293634000  | 4.464724000  | 2.492692000  |
|    |             |              |              | 1 | 2.231095000  | 4.940835000  | 2.767912000  |
|    |             |              |              | 6 | 1.272136000  | 3.581006000  | 1.412782000  |
|    |             |              |              | 6 | -2.459688000 | 2.595816000  | 1.461276000  |
|    |             |              |              | 1 | -2.330766000 | 2.013705000  | 0.542816000  |
|    |             |              |              | 6 | -3.542827000 | 3.648817000  | 1.192939000  |
|    |             |              |              | 1 | -3.252834000 | 4.335938000  | 0.392054000  |
|    |             |              |              | 1 | -3.747541000 | 4.245478000  | 2.088198000  |
|    |             |              |              | 1 | -4.477857000 | 3.161327000  | 0.898412000  |
|    |             |              |              | 6 | -2.916068000 | 1.641183000  | 2.571920000  |
|    |             |              |              | 1 | -2.162203000 | 0.873223000  | 2.767526000  |
|    |             |              |              | 1 | -3.854407000 | 1.148668000  | 2.293888000  |
|    |             |              |              | 1 | -3.086976000 | 2.189066000  | 3.505602000  |
|    |             |              |              | 6 | 2.565037000  | 3.284969000  | 0.672755000  |
|    |             |              |              | 1 | 2.332939000  | 2.671658000  | -0.202228000 |
|    |             |              |              | 6 | 3.236415000  | 4.569869000  | 0.174433000  |
|    |             |              |              | 1 | 2.536174000  | 5.182353000  | -0.402465000 |
|    |             |              |              | 1 | 4.092330000  | 4.328360000  | -0.464839000 |
|    |             |              |              | 1 | 3.608226000  | 5.172576000  | 1.010481000  |
|    |             |              |              | 6 | 3.513094000  | 2.471370000  | 1.563012000  |
|    |             |              |              | 1 | 3.039814000  | 1.538732000  | 1.888177000  |
|    |             |              |              | 1 | 3.787694000  | 3.038239000  | 2.459593000  |
|    |             |              |              | 1 | 4.433248000  | 2.223745000  | 1.022852000  |
|    |             |              |              | 6 | -0.052188000 | -2.965896000 | 1.073712000  |
|    |             |              |              | 6 | -1.272136000 | -3.581006000 | 1.412782000  |
|    |             |              |              | 6 | -1.293634000 | -4.464724000 | 2.492692000  |
|    |             |              |              | 1 | -2.231095000 | -4.940835000 | 2.767912000  |
|    |             |              |              | 6 | -0.145942000 | -4.738347000 | 3.225363000  |
|    |             |              |              | 1 | -0.183866000 | -5.426536000 | 4.064014000  |
|    |             |              |              | 6 | 1.049440000  | -4.122380000 | 2.879423000  |
|    |             |              |              | 1 | 1.947498000  | -4.334119000 | 3.454070000  |

BS-<sup>1</sup>(<sup>Ph</sup>I<sub>2</sub>P)GaH-SP:



|                                            |              |              |              |   |              |              |              |
|--------------------------------------------|--------------|--------------|--------------|---|--------------|--------------|--------------|
| 6                                          | 1.121958000  | -3.232346000 | 1.806366000  | 6 | -3.726730000 | 1.826755000  | -0.047148000 |
| 6                                          | -2.565037000 | -3.284969000 | 0.672755000  | 6 | -4.725425000 | 1.459587000  | -0.958808000 |
| 1                                          | -2.332939000 | -2.671658000 | -0.202228000 | 1 | -4.485680000 | 0.767519000  | -1.758935000 |
| 6                                          | -3.513094000 | -2.471370000 | 1.563012000  | 6 | -6.010183000 | 1.977344000  | -0.848216000 |
| 1                                          | -3.039814000 | -1.538732000 | 1.888177000  | 1 | -6.770270000 | 1.683076000  | -1.565030000 |
| 1                                          | -3.787694000 | -3.038239000 | 2.459593000  | 6 | -6.322697000 | 2.871935000  | 0.174567000  |
| 1                                          | -4.433248000 | -2.223745000 | 1.022852000  | 1 | -7.327753000 | 3.272717000  | 0.259988000  |
| 6                                          | -3.236415000 | -4.569869000 | 0.174433000  | 6 | -5.340631000 | 3.242702000  | 1.089129000  |
| 1                                          | -2.536174000 | -5.182353000 | -0.402465000 | 1 | -5.577416000 | 3.927995000  | 1.897056000  |
| 1                                          | -4.092330000 | -4.328360000 | -0.464839000 | 6 | -4.055231000 | 2.718934000  | 0.983949000  |
| 1                                          | -3.608226000 | -5.172576000 | 1.010481000  | 1 | -3.299843000 | 2.978044000  | 1.720213000  |
| 6                                          | 2.459688000  | -2.595816000 | 1.461276000  | 6 | 3.726739000  | 1.826747000  | 0.047186000  |
| 1                                          | 2.330766000  | -2.013705000 | 0.542816000  | 6 | 4.725437000  | 1.459536000  | 0.958826000  |
| 6                                          | 3.542827000  | -3.648817000 | 1.192939000  | 1 | 4.485694000  | 0.767431000  | 1.758921000  |
| 1                                          | 4.477857000  | -3.161327000 | 0.898412000  | 6 | 6.010195000  | 1.977297000  | 0.848253000  |
| 1                                          | 3.252834000  | -4.335938000 | 0.392054000  | 1 | 6.770284000  | 1.682996000  | 1.565051000  |
| 1                                          | 3.747541000  | -4.245478000 | 2.088198000  | 6 | 6.322707000  | 2.871933000  | -0.174491000 |
| 6                                          | 2.916068000  | -1.641183000 | 2.571920000  | 1 | 7.327763000  | 3.272717000  | -0.259898000 |
| 1                                          | 2.162203000  | -0.873223000 | 2.767526000  | 6 | 5.340638000  | 3.242742000  | -1.089033000 |
| 1                                          | 3.854407000  | -1.148668000 | 2.293888000  | 1 | 5.577422000  | 3.928070000  | -1.896931000 |
| 1                                          | 3.086976000  | -2.189066000 | 3.505602000  | 6 | 4.055238000  | 2.718972000  | -0.983873000 |
| 1                                          | 0.000000000  | 0.000000000  | 1.982751000  | 1 | 3.299849000  | 2.978115000  | -1.720123000 |
| 31                                         | 0.000000000  | 0.000000000  | 0.410214000  | 6 | -3.149914000 | -1.031207000 | -0.248699000 |
|                                            |              |              |              | 6 | -3.411348000 | -1.717030000 | -1.452480000 |
|                                            |              |              |              | 6 | -4.357433000 | -2.742844000 | -1.444353000 |
|                                            |              |              |              | 1 | -4.562909000 | -3.283189000 | -2.364669000 |
|                                            |              |              |              | 6 | -5.038623000 | -3.084832000 | -0.283247000 |
|                                            |              |              |              | 1 | -5.769677000 | -3.887155000 | -0.294408000 |
|                                            |              |              |              | 6 | -4.776739000 | -2.393663000 | 0.892423000  |
|                                            |              |              |              | 1 | -5.306692000 | -2.664405000 | 1.801921000  |
|                                            |              |              |              | 6 | -3.837020000 | -1.362458000 | 0.934695000  |
|                                            |              |              |              | 6 | -2.693537000 | -1.369177000 | -2.747513000 |
|                                            |              |              |              | 1 | -2.144736000 | -0.434986000 | -2.585393000 |
|                                            |              |              |              | 6 | -3.666639000 | -1.141708000 | -3.911379000 |
|                                            |              |              |              | 1 | -4.419185000 | -0.383561000 | -3.673450000 |
|                                            |              |              |              | 1 | -4.194856000 | -2.063645000 | -4.176133000 |
|                                            |              |              |              | 1 | -3.118969000 | -0.810124000 | -4.799358000 |
|                                            |              |              |              | 6 | -1.681950000 | -2.461163000 | -3.121107000 |
|                                            |              |              |              | 1 | -0.967451000 | -2.641179000 | -2.312297000 |
|                                            |              |              |              | 1 | -1.125600000 | -2.182024000 | -4.022700000 |
| $^{1}(\text{PbI}_2\text{P})\text{InH-SP:}$ |              |              |              |   |              |              |              |
| 7                                          | -2.113585000 | -0.052798000 | -0.225543000 | 6 | -5.038623000 | -3.084832000 | -0.283247000 |
| 7                                          | 0.000004000  | 1.413181000  | -0.000002000 | 1 | -5.769677000 | -3.887155000 | -0.294408000 |
| 7                                          | 2.113588000  | -0.052805000 | 0.225516000  | 6 | -4.776739000 | -2.393663000 | 0.892423000  |
| 6                                          | -2.360522000 | 1.259067000  | -0.129567000 | 1 | -5.306692000 | -2.664405000 | 1.801921000  |
| 6                                          | -1.203930000 | 2.093810000  | -0.051348000 | 6 | -3.837020000 | -1.362458000 | 0.934695000  |
| 6                                          | -1.204833000 | 3.485137000  | -0.079783000 | 6 | -2.693537000 | -1.369177000 | -2.747513000 |
| 1                                          | -2.145871000 | 4.016309000  | -0.169747000 | 1 | -2.144736000 | -0.434986000 | -2.585393000 |
| 6                                          | 0.000004000  | 4.187698000  | 0.000058000  | 6 | -3.666639000 | -1.141708000 | -3.911379000 |
| 1                                          | 0.000006000  | 5.271230000  | 0.000081000  | 1 | -4.419185000 | -0.383561000 | -3.673450000 |
| 6                                          | 1.204844000  | 3.485129000  | 0.079873000  | 1 | -4.194856000 | -2.063645000 | -4.176133000 |
| 1                                          | 2.145882000  | 4.016296000  | 0.169864000  | 1 | -3.118969000 | -0.810124000 | -4.799358000 |
| 6                                          | 1.203936000  | 2.093808000  | 0.051380000  | 6 | -1.681950000 | -2.461163000 | -3.121107000 |
| 6                                          | 2.360530000  | 1.259057000  | 0.129581000  | 1 | -0.967451000 | -2.641179000 | -2.312297000 |
|                                            |              |              |              | 1 | -1.125600000 | -2.182024000 | -4.022700000 |





|   |              |              |              |    |              |              |              |
|---|--------------|--------------|--------------|----|--------------|--------------|--------------|
| 1 | -0.521614000 | 6.937954000  | -1.522333000 | 1  | 2.731771000  | 5.111412000  | -0.476539000 |
| 6 | 1.063431000  | 6.243440000  | -2.803796000 | 1  | 4.232081000  | 4.161406000  | -0.491106000 |
| 1 | 1.305554000  | 7.232555000  | -3.179352000 | 1  | 3.783970000  | 5.078585000  | 0.951960000  |
| 6 | 1.776234000  | 5.130518000  | -3.245275000 | 6  | 3.511360000  | 2.402104000  | 1.575467000  |
| 1 | 2.584557000  | 5.248470000  | -3.960328000 | 1  | 2.978170000  | 1.509215000  | 1.922835000  |
| 6 | 1.468852000  | 3.865650000  | -2.757024000 | 1  | 3.810117000  | 2.972110000  | 2.462087000  |
| 1 | 2.047454000  | 3.005240000  | -3.081256000 | 1  | 4.420203000  | 2.081311000  | 1.055143000  |
| 6 | -0.434825000 | -3.682672000 | -1.824136000 | 6  | -0.099492000 | -3.083575000 | 1.036998000  |
| 6 | 0.272373000  | -4.812465000 | -1.387665000 | 6  | -1.347081000 | -3.647716000 | 1.368537000  |
| 1 | 1.071312000  | -4.694833000 | -0.663703000 | 6  | -1.408106000 | -4.566511000 | 2.417114000  |
| 6 | -0.040000000 | -6.077670000 | -1.872762000 | 1  | -2.367306000 | -5.002474000 | 2.684090000  |
| 1 | 0.521614000  | -6.937954000 | -1.522333000 | 6  | -0.271943000 | -4.923788000 | 3.132075000  |
| 6 | -1.063431000 | -6.243440000 | -2.803796000 | 1  | -0.340991000 | -5.636592000 | 3.947809000  |
| 1 | -1.305554000 | -7.232555000 | -3.179352000 | 6  | 0.952174000  | -4.360034000 | 2.796908000  |
| 6 | -1.776234000 | -5.130518000 | -3.245275000 | 1  | 1.841606000  | -4.638445000 | 3.356508000  |
| 1 | -2.584557000 | -5.248470000 | -3.960328000 | 6  | 1.063048000  | -3.442187000 | 1.751282000  |
| 6 | -1.468852000 | -3.865650000 | -2.757024000 | 6  | -2.626893000 | -3.251342000 | 0.653076000  |
| 1 | -2.047454000 | -3.005240000 | -3.081256000 | 1  | -2.364332000 | -2.634504000 | -0.210675000 |
| 6 | 0.099492000  | 3.083575000  | 1.036998000  | 6  | -3.511360000 | -2.402104000 | 1.575467000  |
| 6 | -1.063048000 | 3.442187000  | 1.751282000  | 1  | -2.978170000 | -1.509215000 | 1.922835000  |
| 6 | -0.952174000 | 4.360034000  | 2.796908000  | 1  | -3.810117000 | -2.972110000 | 2.462087000  |
| 1 | -1.841606000 | 4.638445000  | 3.356508000  | 1  | -4.420203000 | -2.081311000 | 1.055143000  |
| 6 | 0.271943000  | 4.923788000  | 3.132075000  | 6  | -3.385497000 | -4.475433000 | 0.128683000  |
| 1 | 0.340991000  | 5.636592000  | 3.947809000  | 1  | -2.731771000 | -5.111412000 | -0.476539000 |
| 6 | 1.408106000  | 4.566511000  | 2.417114000  | 1  | -4.232081000 | -4.161406000 | -0.491106000 |
| 1 | 2.367306000  | 5.002474000  | 2.684090000  | 1  | -3.783970000 | -5.078585000 | 0.951960000  |
| 6 | 1.347081000  | 3.647716000  | 1.368537000  | 6  | 2.427164000  | -2.863885000 | 1.407586000  |
| 6 | -2.427164000 | 2.863885000  | 1.407586000  | 1  | 2.318879000  | -2.279359000 | 0.487514000  |
| 1 | -2.318879000 | 2.279359000  | 0.487514000  | 6  | 3.466008000  | -3.959197000 | 1.135890000  |
| 6 | -3.466008000 | 3.959197000  | 1.135890000  | 1  | 4.416929000  | -3.510778000 | 0.830462000  |
| 1 | -3.139921000 | 4.637579000  | 0.341707000  | 1  | 3.139921000  | -4.637579000 | 0.341707000  |
| 1 | -3.655357000 | 4.558846000  | 2.032385000  | 1  | 3.655357000  | -4.558846000 | 2.032385000  |
| 1 | -4.416929000 | 3.510778000  | 0.830462000  | 6  | 2.926277000  | -1.930726000 | 2.519147000  |
| 6 | -2.926277000 | 1.930726000  | 2.519147000  | 1  | 2.204034000  | -1.136672000 | 2.733592000  |
| 1 | -2.204034000 | 1.136672000  | 2.733592000  | 1  | 3.880319000  | -1.470088000 | 2.240060000  |
| 1 | -3.880319000 | 1.470088000  | 2.240060000  | 1  | 3.081080000  | -2.490168000 | 3.448636000  |
| 1 | -3.081080000 | 2.490168000  | 3.448636000  | 1  | 0.000000000  | 0.000000000  | 2.323649000  |
| 6 | 2.626893000  | 3.251342000  | 0.653076000  | 49 | 0.000000000  | 0.000000000  | 0.600969000  |
| 1 | 2.364332000  | 2.634504000  | -0.210675000 |    |              |              |              |
| 6 | 3.385497000  | 4.475433000  | 0.128683000  |    |              |              |              |

| BS- <sup>1</sup> ( <sup>Ph</sup> I <sub>2</sub> P)InH-SP: |              |              |              |   |              |              |              |
|-----------------------------------------------------------|--------------|--------------|--------------|---|--------------|--------------|--------------|
|                                                           |              |              |              | 1 | -1.914377000 | 4.738919000  | 3.286401000  |
| 7                                                         | 0.000000000  | 2.119172000  | 0.050897000  | 6 | 0.202598000  | 5.023412000  | 3.097022000  |
| 7                                                         | 0.000000000  | 0.000000000  | -1.429027000 | 1 | 0.255418000  | 5.749282000  | 3.902389000  |
| 7                                                         | 0.000000000  | -2.119172000 | 0.050897000  | 6 | 1.351869000  | 4.658024000  | 2.408228000  |
| 6                                                         | 0.129577000  | 2.358714000  | -1.262697000 | 1 | 2.304988000  | 5.101940000  | 2.683671000  |
| 6                                                         | 0.080716000  | 1.202124000  | -2.102767000 | 6 | 1.311844000  | 3.722482000  | 1.373196000  |
| 6                                                         | 0.052249000  | 1.207958000  | -3.496949000 | 6 | -2.460358000 | 2.924190000  | 1.361034000  |
| 1                                                         | 0.063945000  | 2.151908000  | -4.029475000 | 1 | -2.342427000 | 2.352312000  | 0.434247000  |
| 6                                                         | 0.000000000  | 0.000000000  | -4.194712000 | 6 | -3.517789000 | 4.005985000  | 1.106795000  |
| 1                                                         | 0.000000000  | 0.000000000  | -5.278706000 | 1 | -3.198494000 | 4.715270000  | 0.337018000  |
| 6                                                         | -0.052249000 | -1.207958000 | -3.496949000 | 1 | -3.732827000 | 4.575574000  | 2.016941000  |
| 1                                                         | -0.063945000 | -2.151908000 | -4.029475000 | 1 | -4.454785000 | 3.545828000  | 0.776996000  |
| 6                                                         | -0.080716000 | -1.202124000 | -2.102767000 | 6 | -2.945940000 | 1.967044000  | 2.457978000  |
| 6                                                         | -0.129577000 | -2.358714000 | -1.262697000 | 1 | -2.214276000 | 1.177780000  | 2.655895000  |
| 6                                                         | 0.373649000  | 3.706667000  | -1.826025000 | 1 | -3.894845000 | 1.499835000  | 2.172378000  |
| 6                                                         | -0.399984000 | 4.812024000  | -1.446789000 | 1 | -3.104636000 | 2.510552000  | 3.396377000  |
| 1                                                         | -1.217057000 | 4.674451000  | -0.746755000 | 6 | 2.603772000  | 3.327605000  | 0.679220000  |
| 6                                                         | -0.130947000 | 6.075145000  | -1.960656000 | 1 | 2.358234000  | 2.687127000  | -0.172642000 |
| 1                                                         | -0.742484000 | 6.918556000  | -1.655986000 | 6 | 3.349264000  | 4.552428000  | 0.137253000  |
| 6                                                         | 0.914669000  | 6.260123000  | -2.864092000 | 1 | 2.692600000  | 5.167720000  | -0.485811000 |
| 1                                                         | 1.123232000  | 7.248165000  | -3.262039000 | 1 | 4.206463000  | 4.238794000  | -0.468124000 |
| 6                                                         | 1.693775000  | 5.171451000  | -3.246674000 | 1 | 3.731200000  | 5.177042000  | 0.952311000  |
| 1                                                         | 2.519657000  | 5.306954000  | -3.938062000 | 6 | 3.492396000  | 2.512239000  | 1.627592000  |
| 6                                                         | 1.431019000  | 3.907810000  | -2.726260000 | 1 | 2.968835000  | 1.619600000  | 1.987945000  |
| 1                                                         | 2.064484000  | 3.067268000  | -2.994429000 | 1 | 3.775838000  | 3.107328000  | 2.502788000  |
| 6                                                         | -0.373649000 | -3.706667000 | -1.826025000 | 1 | 4.410066000  | 2.194347000  | 1.121169000  |
| 6                                                         | 0.399984000  | -4.812024000 | -1.446789000 | 6 | -0.072135000 | -3.147596000 | 1.034417000  |
| 1                                                         | 1.217057000  | -4.674451000 | -0.746755000 | 6 | -1.311844000 | -3.722482000 | 1.373196000  |
| 6                                                         | 0.130947000  | -6.075145000 | -1.960656000 | 6 | -1.351869000 | -4.658024000 | 2.408228000  |
| 1                                                         | 0.742484000  | -6.918556000 | -1.655986000 | 1 | -2.304988000 | -5.101940000 | 2.683671000  |
| 6                                                         | -0.914669000 | -6.260123000 | -2.864092000 | 6 | -0.202598000 | -5.023412000 | 3.097022000  |
| 1                                                         | -1.123232000 | -7.248165000 | -3.262039000 | 1 | -0.255418000 | -5.749282000 | 3.902389000  |
| 6                                                         | -1.693775000 | -5.171451000 | -3.246674000 | 6 | 1.014521000  | -4.452492000 | 2.748245000  |
| 1                                                         | -2.519657000 | -5.306954000 | -3.938062000 | 1 | 1.914377000  | -4.738919000 | 3.286401000  |
| 6                                                         | -1.431019000 | -3.907810000 | -2.726260000 | 6 | 1.105192000  | -3.515520000 | 1.717912000  |
| 1                                                         | -2.064484000 | -3.067268000 | -2.994429000 | 6 | -2.603772000 | -3.327605000 | 0.679220000  |
| 6                                                         | 0.072135000  | 3.147596000  | 1.034417000  | 1 | -2.358234000 | -2.687127000 | -0.172642000 |
| 6                                                         | -1.105192000 | 3.515520000  | 1.717912000  | 6 | -3.492396000 | -2.512239000 | 1.627592000  |
| 6                                                         | -1.014521000 | 4.452492000  | 2.748245000  | 1 | -2.968835000 | -1.619600000 | 1.987945000  |
|                                                           |              |              |              | 1 | -3.775838000 | -3.107328000 | 2.502788000  |

|                                            |              |              |              |   |              |              |              |
|--------------------------------------------|--------------|--------------|--------------|---|--------------|--------------|--------------|
| 1                                          | -4.410066000 | -2.194347000 | 1.121169000  | 6 | 1.732634000  | 5.146495000  | -3.358120000 |
| 6                                          | -3.349264000 | -4.552428000 | 0.137253000  | 1 | 2.588395000  | 5.273957000  | -4.013853000 |
| 1                                          | -2.692600000 | -5.167720000 | -0.485811000 | 6 | 1.481764000  | 3.902457000  | -2.785195000 |
| 1                                          | -4.206463000 | -4.238794000 | -0.468124000 | 1 | 2.149006000  | 3.067368000  | -2.979674000 |
| 1                                          | -3.731200000 | -5.177042000 | 0.952311000  | 6 | -0.385893000 | -3.715567000 | -1.931577000 |
| 6                                          | 2.460358000  | -2.924190000 | 1.361034000  | 6 | 0.443205000  | -4.810285000 | -1.654726000 |
| 1                                          | 2.342427000  | -2.352312000 | 0.434247000  | 1 | 1.296227000  | -4.676365000 | -0.997226000 |
| 6                                          | 3.517789000  | -4.005985000 | 1.106795000  | 6 | 0.188894000  | -6.052939000 | -2.222138000 |
| 1                                          | 4.454785000  | -3.545828000 | 0.776996000  | 1 | 0.843982000  | -6.889310000 | -1.999295000 |
| 1                                          | 3.198494000  | -4.715270000 | 0.337018000  | 6 | -0.899513000 | -6.225780000 | -3.076313000 |
| 1                                          | 3.732827000  | -4.575574000 | 2.016941000  | 1 | -1.097842000 | -7.197904000 | -3.516521000 |
| 6                                          | 2.945940000  | -1.967044000 | 2.457978000  | 6 | -1.732634000 | -5.146495000 | -3.358120000 |
| 1                                          | 2.214276000  | -1.177780000 | 2.655895000  | 1 | -2.588395000 | -5.273957000 | -4.013853000 |
| 1                                          | 3.894845000  | -1.499835000 | 2.172378000  | 6 | -1.481764000 | -3.902457000 | -2.785195000 |
| 1                                          | 3.104636000  | -2.510552000 | 3.396377000  | 1 | -2.149006000 | -3.067368000 | -2.979674000 |
| 1                                          | 0.000000000  | 0.000000000  | 2.341644000  | 6 | 0.140965000  | 3.323982000  | 0.935096000  |
| 49                                         | 0.000000000  | 0.000000000  | 0.625669000  | 6 | -1.007892000 | 3.816505000  | 1.589504000  |
|                                            |              |              |              | 6 | -0.852411000 | 4.790461000  | 2.576165000  |
|                                            |              |              |              | 1 | -1.730024000 | 5.172634000  | 3.090529000  |
| $^{1}(\text{PbI}_2\text{P})\text{TIH-SP:}$ |              |              |              | 6 | 0.403635000  | 5.281386000  | 2.910447000  |
| 7                                          | 0.000000000  | 2.248286000  | 0.017838000  | 1 | 0.507610000  | 6.037660000  | 3.682130000  |
| 7                                          | 0.000000000  | 0.000000000  | -1.399519000 | 6 | 1.524836000  | 4.798683000  | 2.248322000  |
| 7                                          | 0.000000000  | -2.248286000 | 0.017838000  | 1 | 2.507387000  | 5.182155000  | 2.511139000  |
| 6                                          | 0.141286000  | 2.394411000  | -1.299119000 | 6 | 1.419493000  | 3.822278000  | 1.256166000  |
| 6                                          | 0.087426000  | 1.202425000  | -2.088194000 | 6 | -2.395245000 | 3.302100000  | 1.240024000  |
| 6                                          | 0.060654000  | 1.201806000  | -3.479896000 | 1 | -2.320160000 | 2.769611000  | 0.285364000  |
| 1                                          | 0.079532000  | 2.147805000  | -4.008893000 | 6 | -3.417359000 | 4.432349000  | 1.069026000  |
| 6                                          | 0.000000000  | 0.000000000  | -4.186609000 | 1 | -3.067408000 | 5.193743000  | 0.364759000  |
| 1                                          | 0.000000000  | 0.000000000  | -5.270009000 | 1 | -3.627260000 | 4.931357000  | 2.020838000  |
| 6                                          | -0.060654000 | -1.201806000 | -3.479896000 | 1 | -4.364151000 | 4.029483000  | 0.695612000  |
| 1                                          | -0.079532000 | -2.147805000 | -4.008893000 | 6 | -2.891203000 | 2.307768000  | 2.298054000  |
| 6                                          | -0.087426000 | -1.202425000 | -2.088194000 | 1 | -2.199284000 | 1.467614000  | 2.415457000  |
| 6                                          | -0.141286000 | -2.394411000 | -1.299119000 | 1 | -3.874178000 | 1.906952000  | 2.027726000  |
| 6                                          | 0.385893000  | 3.715567000  | -1.931577000 | 1 | -2.976989000 | 2.799399000  | 3.273682000  |
| 6                                          | -0.443205000 | 4.810285000  | -1.654726000 | 6 | 2.681136000  | 3.296242000  | 0.593323000  |
| 1                                          | -1.296227000 | 4.676365000  | -0.997226000 | 1 | 2.391109000  | 2.647652000  | -0.238550000 |
| 6                                          | -0.188894000 | 6.052939000  | -2.222138000 | 6 | 3.536164000  | 4.430880000  | 0.018464000  |
| 1                                          | -0.843982000 | 6.889310000  | -1.999295000 | 1 | 2.944149000  | 5.071093000  | -0.642566000 |
| 6                                          | 0.899513000  | 6.225780000  | -3.076313000 | 1 | 4.374256000  | 4.021017000  | -0.555415000 |
| 1                                          | 1.097842000  | 7.197904000  | -3.516521000 | 1 | 3.955915000  | 5.055676000  | 0.814441000  |

|                                                      |              |              |              |   |              |              |              |
|------------------------------------------------------|--------------|--------------|--------------|---|--------------|--------------|--------------|
| 6                                                    | 3.490360000  | 2.445310000  | 1.581155000  | 7 | 2.325409000  | 0.075390000  | 0.460075000  |
| 1                                                    | 2.892859000  | 1.611037000  | 1.966808000  | 6 | -2.418688000 | 1.281243000  | 0.000680000  |
| 1                                                    | 3.813063000  | 3.046387000  | 2.438536000  | 6 | -1.152972000 | 2.086523000  | 0.061448000  |
| 1                                                    | 4.382854000  | 2.033185000  | 1.098361000  | 6 | -1.198196000 | 3.486173000  | 0.044282000  |
| 6                                                    | -0.140965000 | -3.323982000 | 0.935096000  | 1 | -2.150677000 | 4.001920000  | 0.021076000  |
| 6                                                    | -1.419493000 | -3.822278000 | 1.256166000  | 6 | -0.003569000 | 4.190616000  | 0.048146000  |
| 6                                                    | -1.524836000 | -4.798683000 | 2.248322000  | 1 | -0.003307000 | 5.275733000  | 0.043808000  |
| 1                                                    | -2.507387000 | -5.182155000 | 2.511139000  | 6 | 1.193186000  | 3.485730000  | 0.052318000  |
| 6                                                    | -0.403635000 | -5.281386000 | 2.910447000  | 1 | 2.143941000  | 4.004555000  | 0.063718000  |
| 1                                                    | -0.507610000 | -6.037660000 | 3.682130000  | 6 | 1.152094000  | 2.087539000  | 0.043461000  |
| 6                                                    | 0.852411000  | -4.790461000 | 2.576165000  | 6 | 2.423245000  | 1.284357000  | 0.069690000  |
| 1                                                    | 1.730024000  | -5.172634000 | 3.090529000  | 6 | -3.688642000 | 1.940977000  | 0.437753000  |
| 6                                                    | 1.007892000  | -3.816505000 | 1.589504000  | 6 | -4.859877000 | 1.854178000  | -0.322281000 |
| 6                                                    | -2.681136000 | -3.296242000 | 0.593323000  | 1 | -4.858325000 | 1.303805000  | -1.257444000 |
| 1                                                    | -2.391109000 | -2.647652000 | -0.238550000 | 6 | -6.028842000 | 2.466227000  | 0.120935000  |
| 6                                                    | -3.490360000 | -2.445310000 | 1.581155000  | 1 | -6.929548000 | 2.397953000  | -0.480395000 |
| 1                                                    | -2.892859000 | -1.611037000 | 1.966808000  | 6 | -6.046909000 | 3.155780000  | 1.331269000  |
| 1                                                    | -3.813063000 | -3.046387000 | 2.438536000  | 1 | -6.962535000 | 3.625752000  | 1.676001000  |
| 1                                                    | -4.382854000 | -2.033185000 | 1.098361000  | 6 | -4.888295000 | 3.235283000  | 2.100905000  |
| 6                                                    | -3.536164000 | -4.430880000 | 0.018464000  | 1 | -4.897581000 | 3.760960000  | 3.050304000  |
| 1                                                    | -2.944149000 | -5.071093000 | -0.642566000 | 6 | -3.715288000 | 2.636733000  | 1.653097000  |
| 1                                                    | -4.374256000 | -4.021017000 | -0.555415000 | 1 | -2.812005000 | 2.696989000  | 2.254745000  |
| 1                                                    | -3.955915000 | -5.055676000 | 0.814441000  | 6 | 3.687393000  | 1.965234000  | -0.349839000 |
| 6                                                    | 2.395245000  | -3.302100000 | 1.240024000  | 6 | 4.853650000  | 1.876374000  | 0.416415000  |
| 1                                                    | 2.320160000  | -2.769611000 | 0.285364000  | 1 | 4.853035000  | 1.302704000  | 1.337845000  |
| 6                                                    | 3.417359000  | -4.432349000 | 1.069026000  | 6 | 6.016960000  | 2.514633000  | -0.004263000 |
| 1                                                    | 4.364151000  | -4.029483000 | 0.695612000  | 1 | 6.914800000  | 2.445809000  | 0.601334000  |
| 1                                                    | 3.067408000  | -5.193743000 | 0.364759000  | 6 | 6.032712000  | 3.230852000  | -1.199095000 |
| 1                                                    | 3.627260000  | -4.931357000 | 2.020838000  | 1 | 6.943663000  | 3.721789000  | -1.526641000 |
| 6                                                    | 2.891203000  | -2.307768000 | 2.298054000  | 6 | 4.879690000  | 3.307028000  | -1.977517000 |
| 1                                                    | 2.199284000  | -1.467614000 | 2.415457000  | 1 | 4.889769000  | 3.849305000  | -2.917512000 |
| 1                                                    | 3.874178000  | -1.906952000 | 2.027726000  | 6 | 3.711943000  | 2.681991000  | -1.552529000 |
| 1                                                    | 2.976989000  | -2.799399000 | 3.273682000  | 1 | 2.813535000  | 2.732900000  | -2.162278000 |
| 1                                                    | 0.000000000  | 0.000000000  | 2.561390000  | 6 | -3.405955000 | -0.794870000 | -0.620873000 |
| 81                                                   | 0.000000000  | 0.000000000  | 0.800775000  | 6 | -3.633006000 | -1.217391000 | -1.949645000 |
|                                                      |              |              |              | 6 | -4.694194000 | -2.087410000 | -2.189779000 |
|                                                      |              |              |              | 1 | -4.899003000 | -2.411597000 | -3.205003000 |
|                                                      |              |              |              | 6 | -5.479184000 | -2.568311000 | -1.145531000 |
|                                                      |              |              |              | 1 | -6.297057000 | -3.252341000 | -1.349367000 |
|                                                      |              |              |              | 6 | -5.192313000 | -2.194670000 | 0.159082000  |
| <sup>1</sup> ( <sup>Ph</sup> I <sub>2</sub> P)TIH-T: |              |              |              |   |              |              |              |
| 7                                                    | -2.310679000 | 0.086485000  | -0.438939000 |   |              |              |              |
| 7                                                    | -0.000647000 | 1.408296000  | 0.061736000  |   |              |              |              |

|   |              |              |              |    |              |              |              |
|---|--------------|--------------|--------------|----|--------------|--------------|--------------|
| 1 | -5.782587000 | -2.602930000 | 0.975301000  | 6  | 5.109033000  | -0.271066000 | -2.603216000 |
| 6 | -4.153988000 | -1.306521000 | 0.454190000  | 1  | 5.525683000  | 0.544691000  | -2.005602000 |
| 6 | -2.748130000 | -0.700039000 | -3.073405000 | 1  | 4.843604000  | 0.123149000  | -3.589927000 |
| 1 | -1.730551000 | -0.611756000 | -2.672505000 | 1  | 5.897160000  | -1.019071000 | -2.748036000 |
| 6 | -3.189257000 | 0.698675000  | -3.527662000 | 6  | 2.732281000  | -0.846184000 | 3.046539000  |
| 1 | -3.112306000 | 1.432041000  | -2.718426000 | 1  | 1.724717000  | -0.723447000 | 2.629465000  |
| 1 | -4.228266000 | 0.680115000  | -3.879200000 | 6  | 3.183046000  | 0.520641000  | 3.580832000  |
| 1 | -2.557706000 | 1.048096000  | -4.351029000 | 1  | 2.546400000  | 0.836982000  | 4.414020000  |
| 6 | -2.690968000 | -1.644038000 | -4.275029000 | 1  | 3.130529000  | 1.294977000  | 2.808999000  |
| 1 | -2.454626000 | -2.667378000 | -3.968321000 | 1  | 4.216117000  | 0.466386000  | 3.944449000  |
| 1 | -1.911889000 | -1.308559000 | -4.965704000 | 6  | 2.642816000  | -1.853744000 | 4.193419000  |
| 1 | -3.637071000 | -1.659960000 | -4.828680000 | 1  | 2.387124000  | -2.852462000 | 3.827273000  |
| 6 | -3.848201000 | -0.987694000 | 1.908143000  | 1  | 1.869740000  | -1.540215000 | 4.901483000  |
| 1 | -3.045753000 | -0.244339000 | 1.943738000  | 1  | 3.584985000  | -1.920630000 | 4.748920000  |
| 6 | -5.069979000 | -0.404351000 | 2.628594000  | 1  | 0.586569000  | -0.834301000 | -1.910253000 |
| 1 | -5.494891000 | 0.442320000  | 2.081827000  | 81 | -0.007777000 | -1.418783000 | -0.020426000 |
| 1 | -4.793419000 | -0.065393000 | 3.632676000  |    |              |              |              |
| 1 | -5.853288000 | -1.162418000 | 2.740405000  |    |              |              |              |
| 6 | -3.338609000 | -2.238917000 | 2.635944000  |    |              |              |              |
| 1 | -2.440811000 | -2.635511000 | 2.152477000  |    |              |              |              |
| 1 | -4.102134000 | -3.024703000 | 2.639236000  |    |              |              |              |
| 1 | -3.094008000 | -2.000877000 | 3.676714000  |    |              |              |              |
| 6 | 3.411577000  | -0.820490000 | 0.599365000  |    |              |              |              |
| 6 | 4.165373000  | -1.285100000 | -0.494234000 |    |              |              |              |
| 6 | 5.194464000  | -2.194247000 | -0.229729000 |    |              |              |              |
| 1 | 5.790038000  | -2.564874000 | -1.059828000 |    |              |              |              |
| 6 | 5.466187000  | -2.636324000 | 1.056378000  |    |              |              |              |
| 1 | 6.277924000  | -3.335085000 | 1.232992000  |    |              |              |              |
| 6 | 4.672963000  | -2.205393000 | 2.115909000  |    |              |              |              |
| 1 | 4.864398000  | -2.583342000 | 3.115032000  |    |              |              |              |
| 6 | 3.622726000  | -1.315422000 | 1.906642000  |    |              |              |              |
| 6 | 3.878854000  | -0.897719000 | -1.934907000 |    |              |              |              |
| 1 | 3.056818000  | -0.176208000 | -1.951891000 |    |              |              |              |
| 6 | 3.398059000  | -2.117833000 | -2.729955000 |    |              |              |              |
| 1 | 2.486833000  | -2.530211000 | -2.289731000 |    |              |              |              |
| 1 | 4.166913000  | -2.898643000 | -2.757447000 |    |              |              |              |
| 1 | 3.167295000  | -1.826765000 | -3.759866000 |    |              |              |              |

**S6: Reference 12 details.**

12. M. J. Frisch, G. W. Trucks, H. B. Schlegel, G. E. Scuseria, M. A. Robb, J. R. Cheeseman, G.



Scalmani, V. Barone, B. Mennucci, G. A. Petersson, H. Nakatsuji, M. Caricato, X. Li, H. P. Hratchian, A. F. Izmaylov, J. Bloino, G. Zheng, J. L. Sonnenberg, M. Hada, M. Ehara, K. Toyota, R. Fukuda, J. Hasegawa, M. Ishida, T. Nakajima, Y. Honda, O. Kitao, H. Nakai, T. Vreven, J. A. Montgomery, Jr., J. E. Peralta, F. Ogliaro, M. Bearpark, J. J. Heyd, E. Brothers, K. N. Kudin, V. N. Staroverov, R. Kobayashi, J. Normand, K. Raghavachari, A. Rendell, J. C. Burant, S. S. Iyengar, J. Tomasi, M. Cossi, N. Rega, J. M. Millam, M. Klene, J. E. Knox, J. B. Cross, V. Bakken, C. Adamo, J. Jaramillo, R. Gomperts, R. E. Stratmann, O. Yazyev, A. J. Austin, R. Cammi, C. Pomelli, J. W. Ochterski, R. L. Martin, K. Morokuma, V. G. Zakrzewski, G. A. Voth, P. Salvador, J. J. Dannenberg, S. Dapprich, A. D. Daniels, O. Farkas, J. B. Foresman, J. V. Ortiz, J. Cioslowski, and D. J. Fox, Gaussian, Inc., Wallingford CT, 2009.
